# Supplementary material for: Decoding the Molecular Effects of Atovaquone Linked Resistant Mutations on Plasmodium falciparum Cytb-ISP Complex in the Phospholipid Bilayer Membrane
Source: PubMed Central journal article supplement (PMC7926518; doi:10.3390/ijms22042138), 2021-02-21
Supplement: ijms-22-02138-s001.pdf [file ijms-22-02138-s001.pdf]

# Supplementary data: Decoding the molecular effects of atovaquone linked resistant mutations on *Plasmodium falciparum* Cytb-ISP complex in the phospholipid bilayer membrane

Lorna Chebon-Bore <sup>1,†</sup>, Taremekedzwa Allan Sanyanga <sup>1,†</sup>, Colleen Varaidzo Manyumwa <sup>1</sup>, Afrah Khairallah <sup>1</sup> and Özlem Tastan Bishop <sup>1,\*</sup>

<sup>1</sup> Research Unit in Bioinformatics (RUBi), Department of Biochemistry and Microbiology, Rhodes University, Grahamstown 6140, South Africa; [lornajemosop@gmail.com](mailto:lornajemosop@gmail.com), [asanyanga@gmail.com](mailto:asanyanga@gmail.com), [colleen.manyumwa06@gmail.com](mailto:colleen.manyumwa06@gmail.com), [afrahkhairalla@gmail.com](mailto:afrahkhairalla@gmail.com)

† Equally contributed first authorship

\* Correspondence: [o.tastanbishop@ru.ac.za](mailto:o.tastanbishop@ru.ac.za) (Ö.T.B); Tel.: +27-46-603-8072 (O.T.B.)

**Table S1.** Computed pKa (1/2) values for all ionizable groups (side chains) that are coordinated in the metal center of the PfCytb-ISP protein complex (Internal dielectric of 10).

| Deprotonation state( $\epsilon$ ) |            | Deprotonation state( $\delta$ /SG) |            |
|-----------------------------------|------------|------------------------------------|------------|
| Site                              | pKa values | Site                               | pKa values |
| His78                             | 4.7        | His301                             | <0.0       |
| His92                             | <0.0       | His320                             | 1.2        |
| His173                            | 2.6        | Cys299                             | >12.0      |
| His187                            | 4.5        | Cys317                             | 6.6        |
| C-Term                            | 4.7        | N-Term                             | 5.1        |
| Total charge at pH 7.0            | 4          | Isoelectric point                  | 8.64       |

**Table S2.** Titratable residues and pKa values in the PfCytb-ISP protein complex

| Residue | pK (int) | pKa_(1/2) | Residue    | pK (int) | pKa_(1/2) | Residue   | pK (int) | pKa_(1/2) |
|---------|----------|-----------|------------|----------|-----------|-----------|----------|-----------|
| TYR-2   | 11.160   | >12.000   | CYS-310    | 10.463   | 10.189    | ASP-473   | 6.271    | <0.000    |
| CYS-4   | 11.058   | >12.000   | TYR-313    | 12.143   | >12.000   | ARG-477   | 11.789   | >12.000   |
| TYR-14  | 11.330   | >12.000   | CYS-320    | 9.510    | 9.361     | ARG-479   | 11.287   | >12.000   |
| ARG-35  | 12.118   | >12.000   | ASP-325    | 3.876    | 2.734     | GLU-488   | 5.623    | 1.812     |
| TYR-36  | 14.652   | >12.000   | TYR-330    | 10.027   | 10.072    | TYR-492   | 12.303   | >12.000   |
| ASP-39  | 3.584    | 2.076     | ARG-332    | 12.244   | >12.000   | GLU-493   | 4.930    | 3.562     |
| TYR-42  | 10.429   | 10.636    | CYS-340    | 9.619    | 9.393     | ASP-496   | 4.608    | 3.001     |
| TYR-44  | 11.718   | >12.000   | HIS-348    | 5.819    | 4.919     | GLU-497   | 4.451    | 2.924     |
| TYR-45  | 10.057   | 10.160    | TYR-349    | 10.003   | 9.952     | LYS-501   | 10.182   | >12.000   |
| HIS-49  | 6.067    | 6.658     | ARG-350    | 13.576   | >12.000   | CTASN-361 | 5.192    | 4.681     |
| ARG-52  | 12.409   | >12.000   | ARG-351    | 11.992   | >12.000   | ASP-473   | 6.271    | <0.000    |
| GLU-53  | 4.706    | 2.437     | HIS-353    | 2.975    | <0.000    | ARG-477   | 11.789   | >12.000   |
| CYS-59  | 9.050    | 8.825     | TYR-354    | 9.973    | 9.929     | ARG-479   | 11.287   | >12.000   |
| ARG-61  | 10.818   | >12.000   | ASP-355    | 5.352    | 3.234     |           |          |           |
| TYR-62  | 11.376   | 11.657    | TYR-356    | 9.834    | 10.132    |           |          |           |
| HID-64  | 6.239    | 4.746     | NTASN-1    | 6.908    | 5.029     |           |          |           |
| TYR-76  | 11.774   | >12.000   | NT CYS-362 | 8.126    | 7.935     |           |          |           |
| HIS-78  | 4.667    | <0.000    | LYS-363    | 10.201   | 10.024    |           |          |           |
| ARG-81  | 10.864   | >12.000   | HIS-366    | 6.496    | 5.836     |           |          |           |
| TYR-85  | 12.449   | 10.926    | LYS-372    | 10.203   | 10.941    |           |          |           |
| TYR-87  | 12.909   | >12.000   | ASP-373    | 3.921    | 2.741     |           |          |           |
| TYR-89  | 10.095   | 9.951     | GLU-381    | 5.545    | 5.074     |           |          |           |
| TYR-112 | 10.773   | >12.000   | ASP-383    | 3.867    | 1.768     |           |          |           |
| TYR-121 | 12.813   | >12.000   | ARG-385    | 12.067   | >12.000   |           |          |           |
| CYS-142 | 11.459   | 11.532    | GLU-391    | 4.212    | 3.079     |           |          |           |
| TYR-145 | 12.226   | 9.966     | HIS-392    | 5.725    | 4.122     |           |          |           |
| ASP-149 | 4.262    | 0.551     | LYS-396    | 10.095   | 10.531    |           |          |           |
| LYS-153 | 9.714    | >12.000   | ARG-398    | 12.462   | >12.000   |           |          |           |
| ARG-154 | 12.600   | >12.000   | LYS-400    | 9.934    | >12.000   |           |          |           |

|         |        |         |         |        |         |  |
|---------|--------|---------|---------|--------|---------|--|
| HIS-159 | 5.792  | 2.608   | LYS-405 | 10.189 | >12.000 |  |
| CYS-168 | 9.273  | 9.182   | HID-406 | 7.143  | 7.022   |  |
| HID-173 | 6.246  | 4.463   | ARG-407 | 12.854 | >12.000 |  |
| HIS-178 | 6.066  | 5.662   | GLU-410 | 5.172  | 4.492   |  |
| HIS-180 | 6.564  | 5.832   | ASP-411 | 4.318  | <0.000  |  |
| TYR-188 | 11.056 | 10.993  | ARG-414 | 12.066 | >12.000 |  |
| ASP-189 | 3.965  | 2.709   | LYS-416 | 9.838  | >12.000 |  |
| LYS-193 | 9.978  | 10.823  | GLU-417 | 5.511  | 2.963   |  |
| TYR-197 | 9.328  | 9.343   | ASP-418 | 5.434  | 0.436   |  |
| ASP-204 | 4.730  | 3.064   | ASP-419 | 3.755  | 2.706   |  |
| LYS-206 | 10.360 | 10.876  | LYS-420 | 10.393 | 11.725  |  |
| HID-228 | 4.530  | 4.797   | ARG-426 | 12.923 | >12.000 |  |
| ASP-230 | 3.544  | 2.014   | ASP-427 | 3.237  | 1.368   |  |
| TYR-238 | 12.779 | >12.000 | ASP-431 | 7.220  | <0.000  |  |
| GLU-247 | 6.434  | 3.415   | ASP-433 | 3.770  | 3.138   |  |
| TYR-249 | 14.109 | >12.000 | ARG-434 | 12.729 | >12.000 |  |
| LYS-258 | 11.439 | >12.000 | LYS-437 | 9.841  | >12.000 |  |
| LYS-263 | 10.896 | 11.739  | GLU-439 | 5.317  | 3.630   |  |
| GLU-282 | 4.497  | 2.110   | CYS-447 | 8.775  | >12.000 |  |
| ARG-284 | 12.469 | >12.000 | HIS-449 | 3.925  | <0.000  |  |
| LYS-293 | 10.144 | 10.054  | TYR-460 | 10.496 | 11.004  |  |
| ARG-299 | 13.129 | >12.000 | TYR-463 | 14.864 | >12.000 |  |
| ASP-300 | 4.115  | 2.877   | CYS-465 | 7.745  | 6.648   |  |
| TYR-301 | 10.462 | 11.616  | HID-468 | 5.114  | 1.246   |  |

**Table S3.** Partial atomic charges before (formal charge) and after charge calculations restrained electrostatic potential (RESP) charges derived using gaussian09 software using B3LYP/6-31G\* basic set at DFT level of theory. NB: RESP charges for only the coordinating residues are presented below.

| Atoms            | Initial atomic Charge | RESP charge |
|------------------|-----------------------|-------------|
|                  | BEFORE                | AFTER       |
| FE1 (HEME BL)    | 2.0000                | -0.0093     |
| FE1 (HEME BH)    | 2.0000                | -0.0093     |
| FE2 [2FE-2S]     | 2.0000                | 0.5906      |
| FE3 [2FE-2S]     | 2.0000                | 0.7323      |
| SG1 CYS [2FE-2S] | -2.0000               | -0.8579     |
| SG2 CYS [2FE-2S] | -2.0000               | -0.6260     |

**Table S4.** Parameter and coordinate files for both Heme & [2FE-2S] cluster model B3LYP/6-31G\* containing optimized coordinates and derived atomic partial charges (AMBER parameter files included also):

- (a) Protoporphyrin IX containing FE; Heme (HEM.mol2)
- (b) Heme proximal histidine ligand (His78.mol2)
- (c) Heme distal histidine ligand (His173.mol2)
- (d) [2FE-2S] proximal histidine ligand (His301.mol2)
- (e) [2FE-2S] distal histidine ligand (His320.mol2)
- (f) [2FE-2S] proximal cysteine ligand (Cys299.mol2)
- (g) [2FE-2S] distal cysteine ligand (Cys317.mol2)
- (h) An AMBER parameter (\*.frcmod) file

(a) Protoporphyrin IX Heme octa-coordinate and its derived atomic charges.

HEM.mol2

@<TRIPOS>MOLECULE

HEM

72 76 1 0 0

SMALL

RESP Charge

@<TRIPOS>ATOM

|    |      |         |         |         |    |   |     |           |
|----|------|---------|---------|---------|----|---|-----|-----------|
| 1  | CHA  | 56.5750 | 66.3360 | 63.4640 | ce | 1 | HEM | -0.053091 |
| 2  | CHB  | 60.1540 | 67.7760 | 66.4260 | ce | 1 | HEM | -0.142569 |
| 3  | CHC  | 57.4820 | 66.6740 | 70.2620 | ce | 1 | HEM | -0.109350 |
| 4  | CHD  | 53.9860 | 65.2570 | 67.2620 | ce | 1 | HEM | -0.139521 |
| 5  | C1A  | 57.8200 | 66.8080 | 63.9350 | cc | 1 | HEM | -0.074815 |
| 6  | C2A  | 58.9610 | 67.3250 | 63.1290 | cc | 1 | HEM | -0.097541 |
| 7  | C3A  | 59.9930 | 67.6700 | 63.9390 | cd | 1 | HEM | 0.042618  |
| 8  | C4A  | 59.4420 | 67.4480 | 65.2850 | cd | 1 | HEM | -0.055780 |
| 9  | CMA  | 61.3210 | 68.2390 | 63.5190 | c3 | 1 | HEM | -0.105332 |
| 10 | CAA  | 58.9710 | 67.6000 | 61.6440 | c3 | 1 | HEM | -0.022660 |
| 11 | CBA  | 58.1140 | 68.8300 | 61.4130 | c3 | 1 | HEM | -0.041797 |
| 12 | CGA  | 57.7700 | 69.0520 | 59.9490 | c  | 1 | HEM | 0.541097  |
| 13 | O1A  | 58.6220 | 69.5690 | 59.1970 | o  | 1 | HEM | -0.620901 |
| 14 | O2A  | 56.6400 | 68.7090 | 59.5600 | o  | 1 | HEM | -0.413672 |
| 15 | C1B  | 59.7360 | 67.6250 | 67.7480 | cc | 1 | HEM | -0.099086 |
| 16 | C2B  | 60.5620 | 67.8750 | 68.9500 | cc | 1 | HEM | 0.060434  |
| 17 | C3B  | 59.8020 | 67.5880 | 70.0560 | cd | 1 | HEM | -0.027679 |
| 18 | C4B  | 58.5100 | 67.1300 | 69.5160 | cd | 1 | HEM | -0.054395 |
| 19 | CMB  | 61.9990 | 68.4120 | 68.9750 | c3 | 1 | HEM | -0.068779 |
| 20 | CAB  | 60.1620 | 67.7100 | 71.3790 | cf | 1 | HEM | -0.095735 |
| 21 | CBB  | 61.4930 | 67.3490 | 72.0660 | c2 | 1 | HEM | -0.533903 |
| 22 | C1C  | 56.3060 | 66.0990 | 69.7970 | cc | 1 | HEM | -0.019937 |
| 23 | C2C  | 55.2140 | 65.4930 | 70.6100 | cc | 1 | HEM | 0.051407  |
| 24 | C3C  | 54.2770 | 65.0860 | 69.6910 | cd | 1 | HEM | -0.018292 |
| 25 | C4C  | 54.7650 | 65.4670 | 68.4040 | cd | 1 | HEM | -0.059841 |
| 26 | CMC  | 55.1110 | 65.3790 | 72.1150 | c3 | 1 | HEM | -0.139834 |
| 27 | CAC  | 53.0820 | 64.4560 | 69.8290 | cf | 1 | HEM | -0.148847 |
| 28 | CBC  | 52.5290 | 63.7950 | 71.1010 | c2 | 1 | HEM | -0.560753 |
| 29 | C1D  | 54.3020 | 65.4620 | 65.9720 | cc | 1 | HEM | -0.053396 |
| 30 | C2D  | 53.4620 | 65.0580 | 64.8450 | cc | 1 | HEM | 0.040491  |
| 31 | C3D  | 54.1720 | 65.4390 | 63.7570 | cd | 1 | HEM | -0.066318 |
| 32 | C4D  | 55.4860 | 65.9830 | 64.2460 | cd | 1 | HEM | -0.055737 |
| 33 | CMD  | 52.1540 | 64.2910 | 64.9280 | c3 | 1 | HEM | -0.101229 |
| 34 | CAD  | 53.8050 | 65.2490 | 62.2930 | c3 | 1 | HEM | -0.019091 |
| 35 | CBD  | 53.1580 | 66.4690 | 61.6420 | c3 | 1 | HEM | -0.006871 |
| 36 | CGD  | 54.1670 | 67.5250 | 61.2390 | c  | 1 | HEM | 0.611618  |
| 37 | O1D  | 54.0410 | 68.6920 | 61.6790 | o  | 1 | HEM | -0.659831 |
| 38 | O2D  | 55.0900 | 67.1730 | 60.4790 | o  | 1 | HEM | -0.516704 |
| 39 | NA   | 58.1540 | 66.9310 | 65.2830 | Y3 | 1 | HEM | -0.094695 |
| 40 | NB   | 58.4810 | 67.1140 | 68.0970 | Y4 | 1 | HEM | -0.011203 |
| 41 | NC   | 55.9850 | 66.0330 | 68.4530 | Y5 | 1 | HEM | 0.040970  |
| 42 | ND   | 55.5520 | 65.9930 | 65.6200 | Y6 | 1 | HEM | -0.059847 |
| 43 | HMA1 | 61.5890 | 67.8460 | 62.6730 | hc | 1 | HEM | 0.040745  |
| 44 | HMA2 | 61.9880 | 68.0370 | 64.1940 | hc | 1 | HEM | 0.040745  |
| 45 | HMA3 | 61.2440 | 69.2010 | 63.4190 | hc | 1 | HEM | 0.040745  |
| 46 | HMB1 | 62.1430 | 68.9140 | 69.7920 | hc | 1 | HEM | 0.030254  |

|    |      |         |         |         |    |   |     |           |
|----|------|---------|---------|---------|----|---|-----|-----------|
| 47 | HMB2 | 62.1410 | 68.9920 | 68.2110 | hc | 1 | HEM | 0.030254  |
| 48 | HMB3 | 62.6230 | 67.6700 | 68.9380 | hc | 1 | HEM | 0.030254  |
| 49 | HMC1 | 54.1770 | 65.3950 | 72.3780 | hc | 1 | HEM | 0.051120  |
| 50 | HMC2 | 55.5760 | 66.1230 | 72.5290 | hc | 1 | HEM | 0.051120  |
| 51 | HMC3 | 55.5140 | 64.5460 | 72.4050 | hc | 1 | HEM | 0.051120  |
| 52 | HMD1 | 51.5830 | 64.5440 | 64.1860 | hc | 1 | HEM | 0.037984  |
| 53 | HMD2 | 51.7090 | 64.4990 | 65.7640 | hc | 1 | HEM | 0.037984  |
| 54 | HMD3 | 52.3340 | 63.3390 | 64.8870 | hc | 1 | HEM | 0.037984  |
| 55 | HBB1 | 61.6010 | 67.4930 | 73.0190 | ha | 1 | HEM | 0.197664  |
| 56 | HBB2 | 62.2220 | 66.9780 | 71.5450 | ha | 1 | HEM | 0.197664  |
| 57 | HBC1 | 51.6570 | 63.3700 | 71.0870 | ha | 1 | HEM | 0.187462  |
| 58 | HBC2 | 53.0520 | 63.8020 | 71.9180 | ha | 1 | HEM | 0.187462  |
| 59 | HBA1 | 58.5800 | 69.6100 | 61.7520 | hc | 1 | HEM | 0.046864  |
| 60 | HBA2 | 57.2930 | 68.7460 | 61.9230 | hc | 1 | HEM | 0.046864  |
| 61 | HAA1 | 58.6210 | 66.8410 | 61.1520 | hc | 1 | HEM | 0.044499  |
| 62 | HAA2 | 59.8760 | 67.7490 | 61.3290 | hc | 1 | HEM | 0.044499  |
| 63 | HBD1 | 52.5180 | 66.8580 | 62.2580 | hc | 1 | HEM | -0.005904 |
| 64 | HBD2 | 52.6610 | 66.1870 | 60.8580 | hc | 1 | HEM | -0.005904 |
| 65 | HAD1 | 53.1980 | 64.4960 | 62.2180 | hc | 1 | HEM | 0.022799  |
| 66 | HAD2 | 54.6060 | 65.0180 | 61.7970 | hc | 1 | HEM | 0.022799  |
| 67 | HHA  | 56.4760 | 66.2540 | 62.5430 | ha | 1 | HEM | 0.159129  |
| 68 | HHB  | 61.0020 | 68.1360 | 66.2970 | ha | 1 | HEM | 0.148531  |
| 69 | HHC  | 57.5700 | 66.7530 | 71.1840 | ha | 1 | HEM | 0.110019  |
| 70 | HHD  | 53.1290 | 64.9300 | 67.4170 | ha | 1 | HEM | 0.111705  |
| 71 | HAB  | 59.4790 | 68.0760 | 71.9630 | ha | 1 | HEM | 0.129768  |
| 72 | HAC  | 52.5180 | 64.4190 | 69.0410 | ha | 1 | HEM | 0.165550  |

@<TRIPOS>BOND

|    |    |    |   |
|----|----|----|---|
| 1  | 1  | 5  | 1 |
| 2  | 1  | 32 | 1 |
| 3  | 1  | 67 | 1 |
| 4  | 2  | 8  | 1 |
| 5  | 2  | 15 | 1 |
| 6  | 2  | 68 | 1 |
| 7  | 3  | 18 | 1 |
| 8  | 3  | 22 | 1 |
| 9  | 3  | 69 | 1 |
| 10 | 4  | 25 | 1 |
| 11 | 4  | 29 | 1 |
| 12 | 4  | 70 | 1 |
| 13 | 5  | 6  | 1 |
| 14 | 5  | 39 | 1 |
| 15 | 6  | 7  | 1 |
| 16 | 6  | 10 | 1 |
| 17 | 7  | 8  | 1 |
| 18 | 7  | 9  | 1 |
| 19 | 8  | 39 | 1 |
| 20 | 9  | 43 | 1 |
| 21 | 9  | 44 | 1 |
| 22 | 9  | 45 | 1 |
| 23 | 10 | 11 | 1 |
| 24 | 10 | 61 | 1 |
| 25 | 10 | 62 | 1 |
| 26 | 11 | 12 | 1 |
| 27 | 11 | 59 | 1 |
| 28 | 11 | 60 | 1 |
| 29 | 12 | 13 | 1 |
| 30 | 12 | 14 | 1 |
| 31 | 15 | 16 | 1 |
| 32 | 15 | 40 | 1 |
| 33 | 16 | 17 | 1 |
| 34 | 16 | 19 | 1 |
| 35 | 17 | 18 | 1 |



|    |    |    |   |
|----|----|----|---|
| 36 | 17 | 20 | 1 |
| 37 | 18 | 40 | 1 |
| 38 | 19 | 46 | 1 |
| 39 | 19 | 47 | 1 |
| 40 | 19 | 48 | 1 |
| 41 | 20 | 21 | 1 |
| 42 | 20 | 71 | 1 |
| 43 | 21 | 55 | 1 |
| 44 | 21 | 56 | 1 |
| 45 | 22 | 23 | 1 |
| 46 | 22 | 41 | 1 |
| 47 | 23 | 24 | 1 |
| 48 | 23 | 26 | 1 |
| 49 | 24 | 25 | 1 |
| 50 | 24 | 27 | 1 |
| 51 | 25 | 41 | 1 |
| 52 | 26 | 49 | 1 |
| 53 | 26 | 50 | 1 |
| 54 | 26 | 51 | 1 |
| 55 | 27 | 28 | 1 |
| 56 | 27 | 72 | 1 |
| 57 | 28 | 57 | 1 |
| 58 | 28 | 58 | 1 |
| 59 | 29 | 30 | 1 |
| 60 | 29 | 42 | 1 |
| 61 | 30 | 31 | 1 |
| 62 | 30 | 33 | 1 |
| 63 | 31 | 32 | 1 |
| 64 | 31 | 34 | 1 |
| 65 | 32 | 42 | 1 |
| 66 | 33 | 52 | 1 |
| 67 | 33 | 53 | 1 |
| 68 | 33 | 54 | 1 |
| 69 | 34 | 35 | 1 |
| 70 | 34 | 65 | 1 |
| 71 | 34 | 66 | 1 |
| 72 | 35 | 36 | 1 |
| 73 | 35 | 63 | 1 |
| 74 | 35 | 64 | 1 |
| 75 | 36 | 37 | 1 |
| 76 | 36 | 38 | 1 |

@<TRIPOS>SUBSTRUCTURE

1 HEM

1 TEMP

0 \*\*\*\* \*

0 ROOT

(b) HEME proximal histidine ligand coordinates and atomic charges

His78.mol2

@<TRIPOS>MOLECULE

HD3

17 17 1 0 0

SMALL

RESP Charge

@<TRIPOS>ATOM

|    |     |         |         |         |    |   |     |           |
|----|-----|---------|---------|---------|----|---|-----|-----------|
| 1  | N   | 55.2010 | 74.0280 | 65.4910 | N  | 1 | HD3 | -0.415700 |
| 2  | H   | 54.4690 | 73.8790 | 65.0650 | H  | 1 | HD3 | 0.235973  |
| 3  | CA  | 55.9850 | 72.8320 | 65.7720 | CX | 1 | HD3 | 0.018800  |
| 4  | HA  | 56.2340 | 72.8430 | 66.7090 | H1 | 1 | HD3 | 0.056284  |
| 5  | CB  | 55.1420 | 71.5730 | 65.5280 | CT | 1 | HD3 | 0.082654  |
| 6  | HB2 | 54.2330 | 71.7390 | 65.8230 | HC | 1 | HD3 | 0.035925  |
| 7  | HB3 | 55.1030 | 71.3980 | 64.5750 | HC | 1 | HD3 | 0.035925  |
| 8  | CG  | 55.6730 | 70.3480 | 66.2320 | CC | 1 | HD3 | -0.172662 |
| 9  | ND1 | 55.4930 | 70.0840 | 67.5890 | NA | 1 | HD3 | -0.192872 |
| 10 | HD1 | 55.1160 | 70.5950 | 68.1690 | H  | 1 | HD3 | 0.329990  |
| 11 | CE1 | 56.0260 | 68.8700 | 67.8090 | CR | 1 | HD3 | -0.034138 |
| 12 | HE1 | 56.0320 | 68.4340 | 68.6300 | H5 | 1 | HD3 | 0.083349  |
| 13 | NE2 | 56.5490 | 68.3760 | 66.6750 | Y1 | 1 | HD3 | -0.014437 |
| 14 | CD2 | 56.3410 | 69.2980 | 65.6670 | CV | 1 | HD3 | -0.005823 |
| 15 | HD2 | 56.6040 | 69.2190 | 64.7780 | H4 | 1 | HD3 | 0.159459  |
| 16 | C   | 57.2920 | 72.8160 | 64.9870 | C  | 1 | HD3 | 0.597300  |
| 17 | O   | 58.3470 | 72.7770 | 65.6090 | O  | 1 | HD3 | -0.567900 |

@<TRIPOS>BOND

|    |    |    |   |
|----|----|----|---|
| 1  | 1  | 2  | 1 |
| 2  | 1  | 3  | 1 |
| 3  | 3  | 4  | 1 |
| 4  | 3  | 5  | 1 |
| 5  | 3  | 16 | 1 |
| 6  | 5  | 6  | 1 |
| 7  | 5  | 7  | 1 |
| 8  | 5  | 8  | 1 |
| 9  | 8  | 9  | 1 |
| 10 | 8  | 14 | 1 |
| 11 | 9  | 10 | 1 |
| 12 | 9  | 11 | 1 |
| 13 | 11 | 12 | 1 |
| 14 | 11 | 13 | 1 |
| 15 | 13 | 14 | 1 |
| 16 | 14 | 15 | 1 |
| 17 | 16 | 17 | 1 |

@<TRIPOS>SUBSTRUCTURE

1 HD3 1 TEMP 0 \*\*\*\*\* 0 ROOT

(c) HEME distal histidine ligand coordinates and atomic charges

His173.mol2

@<TRIPOS>MOLECULE

HD4

17 17 1 0 0

SMALL

RESP Charge

@<TRIPOS>ATOM

|    |     |         |         |         |    |   |     |           |
|----|-----|---------|---------|---------|----|---|-----|-----------|
| 1  | N   | 58.4080 | 59.0740 | 68.6040 | N  | 1 | HD4 | -0.415700 |
| 2  | H   | 58.1220 | 58.7250 | 67.8720 | H  | 1 | HD4 | 0.228349  |
| 3  | CA  | 58.3640 | 60.5340 | 68.5970 | CX | 1 | HD4 | 0.018800  |
| 4  | HA  | 59.2630 | 60.8110 | 68.8350 | H1 | 1 | HD4 | 0.074433  |
| 5  | CB  | 58.0100 | 61.1030 | 67.2150 | CT | 1 | HD4 | 0.048962  |
| 6  | HB2 | 58.6540 | 60.7720 | 66.5700 | HC | 1 | HD4 | 0.034786  |
| 7  | HB3 | 57.1420 | 60.7590 | 66.9520 | HC | 1 | HD4 | 0.034786  |
| 8  | CG  | 57.9760 | 62.6190 | 67.1310 | CC | 1 | HD4 | -0.116106 |
| 9  | ND1 | 59.0670 | 63.4650 | 67.3120 | NA | 1 | HD4 | -0.223384 |
| 10 | HD1 | 59.8780 | 63.2330 | 67.4780 | H  | 1 | HD4 | 0.336786  |
| 11 | CE1 | 58.6010 | 64.7120 | 67.1760 | CR | 1 | HD4 | -0.009107 |
| 12 | HE1 | 59.1130 | 65.4830 | 67.2680 | H5 | 1 | HD4 | 0.136437  |
| 13 | NE2 | 57.2840 | 64.6910 | 66.8870 | Y2 | 1 | HD4 | 0.028113  |
| 14 | CD2 | 56.8650 | 63.3740 | 66.8620 | CV | 1 | HD4 | -0.124850 |
| 15 | HD2 | 56.0040 | 63.0640 | 66.6960 | H4 | 1 | HD4 | 0.152567  |
| 16 | C   | 57.3820 | 61.0980 | 69.6230 | C  | 1 | HD4 | 0.597300  |
| 17 | O   | 57.6140 | 62.1550 | 70.2020 | O  | 1 | HD4 | -0.567900 |

@<TRIPOS>BOND

|    |    |    |   |
|----|----|----|---|
| 1  | 1  | 2  | 1 |
| 2  | 1  | 3  | 1 |
| 3  | 3  | 4  | 1 |
| 4  | 3  | 5  | 1 |
| 5  | 3  | 16 | 1 |
| 6  | 5  | 6  | 1 |
| 7  | 5  | 7  | 1 |
| 8  | 5  | 8  | 1 |
| 9  | 8  | 9  | 1 |
| 10 | 8  | 14 | 1 |
| 11 | 9  | 10 | 1 |
| 12 | 9  | 11 | 1 |
| 13 | 11 | 12 | 1 |
| 14 | 11 | 13 | 1 |
| 15 | 13 | 14 | 1 |
| 16 | 14 | 15 | 1 |
| 17 | 16 | 17 | 1 |

@<TRIPOS>SUBSTRUCTURE

1 HD4 1 TEMP 0 \*\*\*\* \*\*\*\* 0 ROOT

(d) [2FE-2S] cluster proximal histidine ligand coordinates and atomic charges

His320.mol2

@<TRIPOS>MOLECULE

HE2

17 17 1 0 0

SMALL

RESP Charge

@<TRIPOS>ATOM

|    |     |         |         |         |    |   |     |           |
|----|-----|---------|---------|---------|----|---|-----|-----------|
| 1  | N   | 76.6730 | 60.4870 | 51.0020 | N  | 1 | HE2 | -0.415700 |
| 2  | H   | 76.4680 | 59.6910 | 50.7480 | H  | 1 | HE2 | 0.263227  |
| 3  | CA  | 78.0730 | 60.6710 | 51.2760 | CX | 1 | HE2 | -0.058100 |
| 4  | HA  | 78.0620 | 61.5640 | 51.6540 | H1 | 1 | HE2 | 0.078755  |
| 5  | CB  | 78.6600 | 59.8310 | 52.3950 | CT | 1 | HE2 | -0.005376 |
| 6  | HB2 | 78.7920 | 58.9110 | 52.1170 | HC | 1 | HE2 | 0.059976  |
| 7  | HB3 | 79.5240 | 60.1690 | 52.6770 | HC | 1 | HE2 | 0.059976  |
| 8  | CG  | 77.6500 | 59.9330 | 53.4880 | CC | 1 | HE2 | 0.130370  |
| 9  | ND1 | 76.5060 | 59.1620 | 53.4310 | Z4 | 1 | HE2 | -0.382996 |
| 10 | CE1 | 75.7900 | 59.4580 | 54.5470 | CR | 1 | HE2 | -0.021464 |
| 11 | HE1 | 74.9690 | 59.0730 | 54.7530 | H5 | 1 | HE2 | 0.155613  |
| 12 | NE2 | 76.3940 | 60.3570 | 55.3070 | NA | 1 | HE2 | -0.148993 |
| 13 | HE2 | 76.1180 | 60.6840 | 56.0530 | H  | 1 | HE2 | 0.327309  |
| 14 | CD2 | 77.5690 | 60.6560 | 54.6360 | CW | 1 | HE2 | -0.266746 |
| 15 | HD2 | 78.2090 | 61.2630 | 54.9290 | H4 | 1 | HE2 | 0.185024  |
| 16 | C   | 78.9640 | 60.7970 | 50.0760 | C  | 1 | HE2 | 0.597300  |
| 17 | O   | 80.1690 | 60.5950 | 50.2030 | O  | 1 | HE2 | -0.567900 |

@<TRIPOS>BOND

|    |    |    |   |
|----|----|----|---|
| 1  | 1  | 2  | 1 |
| 2  | 1  | 3  | 1 |
| 3  | 3  | 4  | 1 |
| 4  | 3  | 5  | 1 |
| 5  | 3  | 16 | 1 |
| 6  | 5  | 6  | 1 |
| 7  | 5  | 7  | 1 |
| 8  | 5  | 8  | 1 |
| 9  | 8  | 9  | 1 |
| 10 | 8  | 14 | 1 |
| 11 | 9  | 10 | 1 |
| 12 | 10 | 11 | 1 |
| 13 | 10 | 12 | 1 |
| 14 | 12 | 13 | 1 |
| 15 | 12 | 14 | 1 |
| 16 | 14 | 15 | 1 |
| 17 | 16 | 17 | 1 |

@<TRIPOS>SUBSTRUCTURE

1 HE2 1 TEMP 0 \*\*\*\* 0 ROOT

(e) [2FE-2S] cluster distal histidine ligand coordinates and atomic charges

His301.mol2

@<TRIPOS>MOLECULE

HE1

17 17 1 0 0

SMALL

RESP Charge

@<TRIPOS>ATOM

|    |     |         |         |         |    |   |     |           |
|----|-----|---------|---------|---------|----|---|-----|-----------|
| 1  | N   | 76.9840 | 52.1080 | 51.4450 | N  | 1 | HE1 | -0.415700 |
| 2  | H   | 76.9200 | 52.5150 | 50.5930 | H  | 1 | HE1 | 0.325555  |
| 3  | CA  | 77.2400 | 52.6660 | 52.4610 | CX | 1 | HE1 | -0.058100 |
| 4  | HA  | 78.0560 | 52.1390 | 52.9350 | H1 | 1 | HE1 | 0.038670  |
| 5  | CB  | 77.5370 | 54.0500 | 51.9540 | CT | 1 | HE1 | 0.080741  |
| 6  | HB2 | 78.3760 | 54.0220 | 51.2350 | HC | 1 | HE1 | -0.027235 |
| 7  | HB3 | 76.6270 | 54.3380 | 51.4260 | HC | 1 | HE1 | -0.027235 |
| 8  | CG  | 77.7700 | 55.1340 | 52.9230 | CC | 1 | HE1 | 0.082017  |
| 9  | ND1 | 77.1630 | 55.4180 | 54.1410 | Z2 | 1 | HE1 | -0.454443 |
| 10 | CE1 | 77.7440 | 56.4410 | 54.6630 | CR | 1 | HE1 | 0.089071  |
| 11 | HE1 | 77.5230 | 56.9120 | 55.6000 | H5 | 1 | HE1 | 0.115415  |
| 12 | NE2 | 78.5580 | 56.9320 | 53.6630 | NA | 1 | HE1 | -0.082129 |
| 13 | HE2 | 79.3430 | 57.6740 | 53.8690 | H  | 1 | HE1 | 0.212982  |
| 14 | CD2 | 78.5950 | 56.0730 | 52.6800 | CW | 1 | HE1 | -0.079996 |
| 15 | HD2 | 79.1690 | 56.1450 | 51.8220 | H4 | 1 | HE1 | 0.190476  |
| 16 | C   | 76.0740 | 52.6280 | 53.3580 | C  | 1 | HE1 | 0.597300  |
| 17 | O   | 75.7280 | 51.6550 | 53.9980 | O  | 1 | HE1 | -0.567900 |

@<TRIPOS>BOND

|    |    |    |   |
|----|----|----|---|
| 1  | 1  | 2  | 1 |
| 2  | 1  | 3  | 1 |
| 3  | 3  | 4  | 1 |
| 4  | 3  | 5  | 1 |
| 5  | 3  | 16 | 1 |
| 6  | 5  | 6  | 1 |
| 7  | 5  | 7  | 1 |
| 8  | 5  | 8  | 1 |
| 9  | 8  | 9  | 1 |
| 10 | 8  | 14 | 1 |
| 11 | 9  | 10 | 1 |
| 12 | 10 | 11 | 1 |
| 13 | 10 | 12 | 1 |
| 14 | 12 | 13 | 1 |
| 15 | 12 | 14 | 1 |
| 16 | 14 | 15 | 1 |
| 17 | 16 | 17 | 1 |

@<TRIPOS>SUBSTRUCTURE

1 HE1 1 TEMP 0 \*\*\*\* \*\*\*\* 0 ROOT

(f) [2FE-2S] cluster proximal cysteine ligand coordinates and atomic charges

Cys317.mol2

@<TRIPOS>MOLECULE

CX1

10 9 1 0 0

SMALL

RESP Charge

@<TRIPOS>ATOM

|    |     |         |         |         |    |   |     |           |
|----|-----|---------|---------|---------|----|---|-----|-----------|
| 1  | N   | 73.2370 | 51.9060 | 47.9180 | N  | 1 | CX1 | -0.415700 |
| 2  | H   | 72.7060 | 52.5760 | 48.0110 | H  | 1 | CX1 | 0.267345  |
| 3  | CA  | 74.6370 | 52.1740 | 48.1270 | CX | 1 | CX1 | 0.042900  |
| 4  | HA  | 75.0900 | 51.7480 | 47.3830 | H1 | 1 | CX1 | 0.028004  |
| 5  | CB  | 75.1250 | 53.6340 | 47.9420 | 2C | 1 | CX1 | 0.147741  |
| 6  | HB2 | 76.0690 | 53.6020 | 47.7190 | H1 | 1 | CX1 | -0.056234 |
| 7  | HB3 | 74.6640 | 54.0020 | 47.1720 | H1 | 1 | CX1 | -0.056234 |
| 8  | SG  | 74.9250 | 54.8020 | 49.3090 | Y7 | 1 | CX1 | -0.276273 |
| 9  | C   | 75.0760 | 51.5540 | 49.4170 | C  | 1 | CX1 | 0.597300  |
| 10 | O   | 74.4540 | 51.7120 | 50.4670 | O  | 1 | CX1 | -0.567900 |

@<TRIPOS>BOND

|   |   |    |   |
|---|---|----|---|
| 1 | 1 | 2  | 1 |
| 2 | 1 | 3  | 1 |
| 3 | 3 | 4  | 1 |
| 4 | 3 | 5  | 1 |
| 5 | 3 | 9  | 1 |
| 6 | 5 | 6  | 1 |
| 7 | 5 | 7  | 1 |
| 8 | 5 | 8  | 1 |
| 9 | 9 | 10 | 1 |

@<TRIPOS>SUBSTRUCTURE

|   |     |   |      |   |      |      |   |      |
|---|-----|---|------|---|------|------|---|------|
| 1 | CX1 | 1 | TEMP | 0 | **** | **** | 0 | ROOT |
|---|-----|---|------|---|------|------|---|------|

(g) [2FE-2S] cluster distal cysteine ligand coordinates and atomic charges

Cys299.mol2

@<TRIPOS>MOLECULE

CX2

10 9 1 0 0

SMALL

RESP Charge

@<TRIPOS>ATOM

|    |     |         |         |         |    |   |     |           |
|----|-----|---------|---------|---------|----|---|-----|-----------|
| 1  | N   | 76.1250 | 58.5360 | 44.7370 | N  | 1 | CX2 | -0.415700 |
| 2  | H   | 76.9360 | 58.3270 | 44.9330 | H  | 1 | CX2 | 0.247913  |
| 3  | CA  | 75.2200 | 58.5520 | 45.8390 | CX | 1 | CX2 | 0.042900  |
| 4  | HA  | 74.2890 | 58.5170 | 45.5690 | H1 | 1 | CX2 | 0.028474  |
| 5  | CB  | 75.4370 | 57.3240 | 46.6870 | 2C | 1 | CX2 | -0.023435 |
| 6  | HB2 | 75.4190 | 56.5340 | 46.1240 | H1 | 1 | CX2 | 0.098355  |
| 7  | HB3 | 76.3170 | 57.3620 | 47.0940 | H1 | 1 | CX2 | 0.098355  |
| 8  | SG  | 74.1830 | 57.1740 | 47.9760 | Y8 | 1 | CX2 | -0.454266 |
| 9  | C   | 75.4600 | 59.8410 | 46.5610 | C  | 1 | CX2 | 0.597300  |
| 10 | O   | 76.5310 | 60.0950 | 47.1120 | O  | 1 | CX2 | -0.567900 |

@<TRIPOS>BOND

|   |   |    |   |
|---|---|----|---|
| 1 | 1 | 2  | 1 |
| 2 | 1 | 3  | 1 |
| 3 | 3 | 4  | 1 |
| 4 | 3 | 5  | 1 |
| 5 | 3 | 9  | 1 |
| 6 | 5 | 6  | 1 |
| 7 | 5 | 7  | 1 |
| 8 | 5 | 8  | 1 |
| 9 | 9 | 10 | 1 |

@<TRIPOS>SUBSTRUCTURE

|   |     |   |      |   |      |      |   |      |
|---|-----|---|------|---|------|------|---|------|
| 1 | CX2 | 1 | TEMP | 0 | **** | **** | 0 | ROOT |
|---|-----|---|------|---|------|------|---|------|

(h) An AMBER parameter (\*.fromod) file

REMARK GOES HERE, THIS FILE IS GENERATED BY MCPB.PY

MASS

|    |        |       |                                               |
|----|--------|-------|-----------------------------------------------|
| M1 | 55.85  |       | Fe ion                                        |
| M2 | 55.85  |       | Fe ion                                        |
| M3 | 55.85  |       | Fe ion                                        |
| Y1 | 14.01  | 0.530 | sp2 N in 5 memb.ring w/LP (HIS,ADE,GUA)       |
| Y2 | 14.01  | 0.530 | sp2 N in 5 memb.ring w/LP (HIS,ADE,GUA)       |
| Y7 | 32.06  | 2.900 | S in disulfide linkage,pol:JPC,102,2399,98    |
| Z2 | 14.01  | 0.530 | sp2 N in 5 memb.ring w/LP (HIS,ADE,GUA)       |
| Y8 | 32.06  | 2.900 | S in disulfide linkage,pol:JPC,102,2399,98    |
| Z4 | 14.01  | 0.530 | sp2 N in 5 memb.ring w/LP (HIS,ADE,GUA)       |
| Y3 | 14.01  | 0.530 | Sp2 N in non-pure aromatic systems, identical |
| Y4 | 14.01  | 0.530 | Sp2 N in non-pure aromatic systems, identical |
| Y5 | 14.01  | 0.530 | Sp2 N in non-pure aromatic systems, identical |
| Y6 | 14.01  | 0.530 | Sp2 N in non-pure aromatic systems, identical |
| Z1 | 32.060 | 2.900 | same as s                                     |
| Z3 | 32.060 | 2.900 | same as s                                     |

BOND

|       |       |        |                                           |
|-------|-------|--------|-------------------------------------------|
| M2-Z1 | 139.7 | 2.1207 | Created by Seminario method using MCPB.py |
| M2-Z3 | 125.7 | 2.1429 | Created by Seminario method using MCPB.py |
| M3-Z1 | 52.8  | 2.3568 | Created by Seminario method using MCPB.py |
| M3-Z3 | 76.5  | 2.2768 | Created by Seminario method using MCPB.py |
| Y1-M1 | 42.7  | 2.0205 | Created by Seminario method using MCPB.py |
| Y2-M1 | 43.0  | 2.0146 | Created by Seminario method using MCPB.py |
| Y3-M1 | 55.9  | 2.0073 | Created by Seminario method using MCPB.py |
| Y4-M1 | 44.2  | 2.0251 | Created by Seminario method using MCPB.py |
| Y5-M1 | 46.2  | 2.0276 | Created by Seminario method using MCPB.py |
| Y6-M1 | 64.2  | 2.0069 | Created by Seminario method using MCPB.py |
| Y7-M2 | 131.0 | 2.1410 | Created by Seminario method using MCPB.py |
| Y8-M2 | 118.6 | 2.1544 | Created by Seminario method using MCPB.py |
| Z2-M3 | 32.8  | 2.2053 | Created by Seminario method using MCPB.py |
| Z4-M3 | 74.0  | 1.9660 | Created by Seminario method using MCPB.py |
| 2C-Y7 | 227.0 | 1.8100 |                                           |
| 2C-Y8 | 227.0 | 1.8100 |                                           |
| CC-Z2 | 410.0 | 1.394  | JCC,7,(1986),230; HIS                     |
| CC-Z4 | 410.0 | 1.394  | JCC,7,(1986),230; HIS                     |
| CR-Y1 | 488.0 | 1.335  | JCC,7,(1986),230; HIS                     |
| CR-Y2 | 488.0 | 1.335  | JCC,7,(1986),230; HIS                     |
| Y1-CV | 410.0 | 1.394  | JCC,7,(1986),230; HIS                     |
| Y2-CV | 410.0 | 1.394  | JCC,7,(1986),230; HIS                     |
| Z2-CR | 488.0 | 1.335  | JCC,7,(1986),230; HIS                     |
| Z4-CR | 488.0 | 1.335  | JCC,7,(1986),230; HIS                     |
| cc-Y3 | 525.4 | 1.3172 | SOURCE3_SOURCE5 4612 0.0083               |
| cc-Y4 | 525.4 | 1.3172 | SOURCE3_SOURCE5 4612 0.0083               |
| cc-Y5 | 525.4 | 1.3172 | SOURCE3_SOURCE5 4612 0.0083               |
| cc-Y6 | 525.4 | 1.3172 | SOURCE3_SOURCE5 4612 0.0083               |
| cd-Y3 | 441.1 | 1.3694 | SOURCE1_SOURCE5 2269 0.0086               |
| cd-Y4 | 441.1 | 1.3694 | SOURCE1_SOURCE5 2269 0.0086               |
| cd-Y5 | 441.1 | 1.3694 | SOURCE1_SOURCE5 2269 0.0086               |
| cd-Y6 | 441.1 | 1.3694 | SOURCE1_SOURCE5 2269 0.0086               |

ANGLE

|            |        |        |                                           |
|------------|--------|--------|-------------------------------------------|
| 2C-SG1-FE2 | 113.72 | 105.40 | Created by Seminario method using MCPB.py |
| 2C-SG2-FE2 | 114.44 | 108.29 | Created by Seminario method using MCPB.py |



|             |        |        |                                           |
|-------------|--------|--------|-------------------------------------------|
| CC-ND1-FE3  | 27.74  | 75.99  | Created by Seminario method using MCPB.py |
| CC-NDI-FE3  | 111.09 | 131.96 | Created by Seminario method using MCPB.py |
| CR-NE2-FE1  | 104.90 | 125.70 | Created by Seminario method using MCPB.py |
| CR-NE2-FE1  | 116.43 | 125.74 | Created by Seminario method using MCPB.py |
| FE1-NE2-CV  | 100.14 | 127.65 | Created by Seminario method using MCPB.py |
| FE1-NE2-CV  | 116.63 | 127.90 | Created by Seminario method using MCPB.py |
| FE2-S1-FE3  | 47.73  | 82.71  | Created by Seminario method using MCPB.py |
| FE2-S2-FE3  | 59.04  | 84.16  | Created by Seminario method using MCPB.py |
| FE3-ND1-CR  | 0.00   | 64.27  | Created by Seminario method using MCPB.py |
| FE3-ND1-CR  | 113.94 | 120.57 | Created by Seminario method using MCPB.py |
| NE2-FE1-NE2 | 168.21 | 178.29 | Created by Seminario method using MCPB.py |
| NE2-FE1-NA  | 134.59 | 91.43  | Created by Seminario method using MCPB.py |
| NE2-FE1-NB  | 139.06 | 91.23  | Created by Seminario method using MCPB.py |
| NE2-FE1-NC  | 127.35 | 91.04  | Created by Seminario method using MCPB.py |
| NE2-FE1-ND  | 134.33 | 87.49  | Created by Seminario method using MCPB.py |
| NE2-FE1-NA  | 118.97 | 88.52  | Created by Seminario method using MCPB.py |
| NE2-FE1-NB  | 130.18 | 90.49  | Created by Seminario method using MCPB.py |
| NE2-FE1-NC  | 116.87 | 89.01  | Created by Seminario method using MCPB.py |
| NE2-FE1-ND  | 126.00 | 90.80  | Created by Seminario method using MCPB.py |
| NA-FE1-NB   | 148.86 | 90.13  | Created by Seminario method using MCPB.py |
| NA-FE1-NC   | 98.29  | 177.53 | Created by Seminario method using MCPB.py |
| NA-FE1-ND   | 141.95 | 90.05  | Created by Seminario method using MCPB.py |
| NB-FE1-NC   | 132.38 | 89.77  | Created by Seminario method using MCPB.py |
| NB-FE1-ND   | 120.06 | 178.71 | Created by Seminario method using MCPB.py |
| NC-FE1-ND   | 130.63 | 90.11  | Created by Seminario method using MCPB.py |
| SG1-FE2-SG2 | 71.89  | 112.81 | Created by Seminario method using MCPB.py |
| SG1-FE2-S1  | 62.87  | 118.90 | Created by Seminario method using MCPB.py |
| SG1-FE2-S2  | 49.14  | 102.83 | Created by Seminario method using MCPB.py |
| SG2-FE2-S1  | 57.34  | 110.40 | Created by Seminario method using MCPB.py |
| SG2-FE2-S2  | 61.01  | 109.01 | Created by Seminario method using MCPB.py |
| ND1-FE3-S1  | 9.62   | 147.65 | Created by Seminario method using MCPB.py |
| ND1-FE3-S2  | 40.97  | 97.83  | Created by Seminario method using MCPB.py |
| ND1-FE3-ND1 | 23.70  | 114.21 | Created by Seminario method using MCPB.py |
| S2-FE2-S1   | 46.25  | 101.55 | Created by Seminario method using MCPB.py |
| S2-FE3-S1   | 93.46  | 90.92  | Created by Seminario method using MCPB.py |
| ND1-FE3-S1  | 64.05  | 95.81  | Created by Seminario method using MCPB.py |
| ND1-FE3-S2  | 55.17  | 95.03  | Created by Seminario method using MCPB.py |
| cc-NA-FE1   | 144.34 | 127.03 | Created by Seminario method using MCPB.py |
| cc-NB-FE1   | 132.43 | 126.78 | Created by Seminario method using MCPB.py |
| cc-NC-FE1   | 139.16 | 127.11 | Created by Seminario method using MCPB.py |
| cc-ND-FE1   | 154.01 | 126.94 | Created by Seminario method using MCPB.py |
| cd-NA-FE1   | 138.95 | 127.38 | Created by Seminario method using MCPB.py |
| cd-NB-FE1   | 133.72 | 127.36 | Created by Seminario method using MCPB.py |
| cd-NC-FE1   | 138.87 | 126.95 | Created by Seminario method using MCPB.py |
| cd-ND-FE1   | 149.99 | 126.74 | Created by Seminario method using MCPB.py |
| CC-CV-Y1    | 70.0   | 120.00 | AA his                                    |
| CC-CV-Y2    | 70.0   | 120.00 | AA his                                    |
| CC-Z2-CR    | 70.0   | 117.00 | AA his                                    |
| CC-Z4-CR    | 70.0   | 117.00 | AA his                                    |
| CR-Y1-CV    | 70.0   | 117.00 | AA his                                    |
| CR-Y2-CV    | 70.0   | 117.00 | AA his                                    |
| CT-CC-Z2    | 70.0   | 120.00 | AA his                                    |
| CT-CC-Z4    | 70.0   | 120.00 | AA his                                    |
| CW-CC-Z2    | 70.0   | 120.00 | AA his                                    |
| CW-CC-Z4    | 70.0   | 120.00 | AA his                                    |
| CX-2C-SG1   | 50.0   | 114.70 |                                           |
| CX-2C-Y8    | 50.0   | 114.70 |                                           |
| NA-CR-Y1    | 70.0   | 120.00 | AA his                                    |
| NA-CR-Y2    | 70.0   | 120.00 | AA his                                    |
| Y1-CR-H5    | 50.0   | 120.00 | AA his                                    |
| Y1-CV-H4    | 50.0   | 120.00 | AA his                                    |
| Y2-CR-H5    | 50.0   | 120.00 | AA his                                    |

|           |       |        |        |                 |      |        |
|-----------|-------|--------|--------|-----------------|------|--------|
| Y2-CV-H4  | 50.0  | 120.00 | AA his |                 |      |        |
| Y3-cc-cc  | 71.57 | 112.56 |        | SOURCE3         | 141  | 4.2871 |
| Y4-cc-cc  | 71.57 | 112.56 |        | SOURCE3         | 141  | 4.2871 |
| Y5-cc-cc  | 71.57 | 112.56 |        | SOURCE3         | 141  | 4.2871 |
| Y6-cc-cc  | 71.57 | 112.56 |        | SOURCE3         | 141  | 4.2871 |
| SG1-2C-H1 | 50.0  | 109.50 |        |                 |      |        |
| Y8-2C-H1  | 50.0  | 109.50 |        |                 |      |        |
| Z2-CR-H5  | 50.0  | 120.00 | AA his |                 |      |        |
| Z2-CR-NA  | 70.0  | 120.00 | AA his |                 |      |        |
| Z4-CR-H5  | 50.0  | 120.00 | AA his |                 |      |        |
| Z4-CR-NA  | 70.0  | 120.00 | AA his |                 |      |        |
| cc-Y3-cd  | 71.76 | 105.49 |        | CORR_SOURCE5    | 1810 | 1.9032 |
| cc-Y4-cd  | 71.76 | 105.49 |        | CORR_SOURCE5    | 1810 | 1.9032 |
| cc-Y5-cd  | 71.76 | 105.49 |        | CORR_SOURCE5    | 1810 | 1.9032 |
| cc-Y6-cd  | 71.76 | 105.49 |        | CORR_SOURCE5    | 1810 | 1.9032 |
| cd-cd-Y3  | 67.63 | 121.98 |        | CORR_SOURCE5    | 141  | 1.9633 |
| cd-cd-Y4  | 67.63 | 121.98 |        | CORR_SOURCE5    | 141  | 1.9633 |
| cd-cd-Y5  | 67.63 | 121.98 |        | CORR_SOURCE5    | 141  | 1.9633 |
| cd-cd-Y6  | 67.63 | 121.98 |        | CORR_SOURCE5    | 141  | 1.9633 |
| ce-cc-Y3  | 68.07 | 121.70 |        | CORR_SOURCE5    | 58   | 1.4179 |
| ce-cc-Y4  | 68.07 | 121.70 |        | CORR_SOURCE5    | 58   | 1.4179 |
| ce-cc-Y5  | 68.07 | 121.70 |        | CORR_SOURCE5    | 58   | 1.4179 |
| ce-cc-Y6  | 68.07 | 121.70 |        | CORR_SOURCE5    | 58   | 1.4179 |
| ce-cd-Y3  | 68.67 | 123.98 |        | SOURCE4_SOURCE5 | 10   | 2.4097 |
| ce-cd-Y4  | 68.67 | 123.98 |        | SOURCE4_SOURCE5 | 10   | 2.4097 |
| ce-cd-Y5  | 68.67 | 123.98 |        | SOURCE4_SOURCE5 | 10   | 2.4097 |
| ce-cd-Y6  | 68.67 | 123.98 |        | SOURCE4_SOURCE5 | 10   | 2.4097 |

DIHE

|              |   |       |       |      |                             |
|--------------|---|-------|-------|------|-----------------------------|
| X -CC-Z2-X   | 2 | 4.8   | 180.0 | 2.0  | JCC,7,(1986),230            |
| X -CC-Z4-X   | 2 | 4.8   | 180.0 | 2.0  | JCC,7,(1986),230            |
| X -CR-Y1-X   | 2 | 10.0  | 180.0 | 2.0  | JCC,7,(1986),230            |
| X -CR-Y2-X   | 2 | 10.0  | 180.0 | 2.0  | JCC,7,(1986),230            |
| X -CV-Y1-X   | 2 | 4.8   | 180.0 | 2.0  | JCC,7,(1986),230            |
| X -CV-Y2-X   | 2 | 4.8   | 180.0 | 2.0  | JCC,7,(1986),230            |
| X -Z2-CR-X   | 2 | 10.0  | 180.0 | 2.0  | JCC,7,(1986),230            |
| X -Z4-CR-X   | 2 | 10.0  | 180.0 | 2.0  | JCC,7,(1986),230            |
| X -cc-Y3-X   | 2 | 9.5   | 180.0 | 2.0  | statistic value from parm94 |
| X -cc-Y4-X   | 2 | 9.5   | 180.0 | 2.0  | statistic value from parm94 |
| X -cc-Y5-X   | 2 | 9.5   | 180.0 | 2.0  | statistic value from parm94 |
| X -cc-Y6-X   | 2 | 9.5   | 180.0 | 2.0  | statistic value from parm94 |
| X -cd-Y3-X   | 2 | 9.5   | 180.0 | 2.0  | statistic value from parm94 |
| X -cd-Y4-X   | 2 | 9.5   | 180.0 | 2.0  | statistic value from parm94 |
| X -cd-Y5-X   | 2 | 9.5   | 180.0 | 2.0  | statistic value from parm94 |
| X -cd-Y6-X   | 2 | 9.5   | 180.0 | 2.0  | statistic value from parm94 |
| 2C-SG1-M2-Y8 | 3 | 0.00  | 0.00  | 3.0  | Treat as zero by MCPB.py    |
| 2C-SG1-M2-Z1 | 3 | 0.00  | 0.00  | 3.0  | Treat as zero by MCPB.py    |
| 2C-SG1-M2-Z3 | 3 | 0.00  | 0.00  | 3.0  | Treat as zero by MCPB.py    |
| 2C-Y8-M2-Z1  | 3 | 0.00  | 0.00  | 3.0  | Treat as zero by MCPB.py    |
| 2C-Y8-M2-Z3  | 3 | 0.00  | 0.00  | 3.0  | Treat as zero by MCPB.py    |
| C -CX-2C-SG1 | 1 | 0.278 | 0.0   | -4.0 | C-C                         |
| C -CX-2C-SG1 | 1 | 0.323 | 0.0   | -3.0 |                             |
| C -CX-2C-SG1 | 1 | 0.394 | 180.0 | -2.0 |                             |
| C -CX-2C-SG1 | 1 | 0.602 | 0.0   | 1.0  |                             |
| C -CX-2C-Y8  | 1 | 0.278 | 0.0   | -4.0 | C-C                         |
| C -CX-2C-Y8  | 1 | 0.323 | 0.0   | -3.0 |                             |
| C -CX-2C-Y8  | 1 | 0.394 | 180.0 | -2.0 |                             |
| C -CX-2C-Y8  | 1 | 0.602 | 0.0   | 1.0  |                             |
| CC-CV-Y1-M1  | 3 | 0.00  | 0.00  | 3.0  | Treat as zero by MCPB.py    |
| CC-CV-Y2-M1  | 3 | 0.00  | 0.00  | 3.0  | Treat as zero by MCPB.py    |
| CC-Z2-M3-Z1  | 3 | 0.00  | 0.00  | 3.0  | Treat as zero by MCPB.py    |
| CC-Z2-M3-Z3  | 3 | 0.00  | 0.00  | 3.0  | Treat as zero by MCPB.py    |

|             |   |       |       |      |                          |
|-------------|---|-------|-------|------|--------------------------|
| CC-Z2-M3-Z4 | 3 | 0.00  | 0.00  | 3.0  | Treat as zero by MCPB.py |
| CC-Z4-M3-Z1 | 3 | 0.00  | 0.00  | 3.0  | Treat as zero by MCPB.py |
| CC-Z4-M3-Z3 | 3 | 0.00  | 0.00  | 3.0  | Treat as zero by MCPB.py |
| CR-Y1-M1-Y2 | 3 | 0.00  | 0.00  | 3.0  | Treat as zero by MCPB.py |
| CR-Y1-M1-Y3 | 3 | 0.00  | 0.00  | 3.0  | Treat as zero by MCPB.py |
| CR-Y1-M1-Y4 | 3 | 0.00  | 0.00  | 3.0  | Treat as zero by MCPB.py |
| CR-Y1-M1-Y5 | 3 | 0.00  | 0.00  | 3.0  | Treat as zero by MCPB.py |
| CR-Y1-M1-Y6 | 3 | 0.00  | 0.00  | 3.0  | Treat as zero by MCPB.py |
| CR-Y2-M1-Y3 | 3 | 0.00  | 0.00  | 3.0  | Treat as zero by MCPB.py |
| CR-Y2-M1-Y4 | 3 | 0.00  | 0.00  | 3.0  | Treat as zero by MCPB.py |
| CR-Y2-M1-Y5 | 3 | 0.00  | 0.00  | 3.0  | Treat as zero by MCPB.py |
| CR-Y2-M1-Y6 | 3 | 0.00  | 0.00  | 3.0  | Treat as zero by MCPB.py |
| CT-CC-Z2-M3 | 3 | 0.00  | 0.00  | 3.0  | Treat as zero by MCPB.py |
| CT-CC-Z4-M3 | 3 | 0.00  | 0.00  | 3.0  | Treat as zero by MCPB.py |
| CW-CC-Z2-M3 | 3 | 0.00  | 0.00  | 3.0  | Treat as zero by MCPB.py |
| CW-CC-Z4-M3 | 3 | 0.00  | 0.00  | 3.0  | Treat as zero by MCPB.py |
| CX-2C-Y7-M2 | 3 | 0.00  | 0.00  | 3.0  | Treat as zero by MCPB.py |
| CX-2C-Y8-M2 | 3 | 0.00  | 0.00  | 3.0  | Treat as zero by MCPB.py |
| CX-CT-CC-Z2 | 1 | 0.047 | 180.0 | -4.0 |                          |
| CX-CT-CC-Z2 | 1 | 0.74  | 0.0   | -3.0 |                          |
| CX-CT-CC-Z2 | 1 | 0.204 | 0.0   | -2.0 |                          |
| CX-CT-CC-Z2 | 1 | 0.69  | 0.0   | 1.0  |                          |
| CX-CT-CC-Z4 | 1 | 0.047 | 180.0 | -4.0 |                          |
| CX-CT-CC-Z4 | 1 | 0.74  | 0.0   | -3.0 |                          |
| CX-CT-CC-Z4 | 1 | 0.204 | 0.0   | -2.0 |                          |
| CX-CT-CC-Z4 | 1 | 0.69  | 0.0   | 1.0  |                          |
| M1-Y1-CR-H5 | 3 | 0.00  | 0.00  | 3.0  | Treat as zero by MCPB.py |
| M1-Y1-CV-H4 | 3 | 0.00  | 0.00  | 3.0  | Treat as zero by MCPB.py |
| M1-Y2-CR-H5 | 3 | 0.00  | 0.00  | 3.0  | Treat as zero by MCPB.py |
| M1-Y2-CV-H4 | 3 | 0.00  | 0.00  | 3.0  | Treat as zero by MCPB.py |
| M1-Y3-cc-cc | 3 | 0.00  | 0.00  | 3.0  | Treat as zero by MCPB.py |
| M1-Y4-cc-cc | 3 | 0.00  | 0.00  | 3.0  | Treat as zero by MCPB.py |
| M1-Y5-cc-cc | 3 | 0.00  | 0.00  | 3.0  | Treat as zero by MCPB.py |
| M1-Y6-cc-cc | 3 | 0.00  | 0.00  | 3.0  | Treat as zero by MCPB.py |
| M2-Y7-2C-H1 | 3 | 0.00  | 0.00  | 3.0  | Treat as zero by MCPB.py |
| M2-Y8-2C-H1 | 3 | 0.00  | 0.00  | 3.0  | Treat as zero by MCPB.py |
| M2-Z1-M3-Z3 | 3 | 0.00  | 0.00  | 3.0  | Treat as zero by MCPB.py |
| M2-Z3-M3-Z1 | 3 | 0.00  | 0.00  | 3.0  | Treat as zero by MCPB.py |
| M3-Z2-CR-H5 | 3 | 0.00  | 0.00  | 3.0  | Treat as zero by MCPB.py |
| M3-Z2-CR-NA | 3 | 0.00  | 0.00  | 3.0  | Treat as zero by MCPB.py |
| M3-Z3-M2-Z1 | 3 | 0.00  | 0.00  | 3.0  | Treat as zero by MCPB.py |
| M3-Z4-CR-H5 | 3 | 0.00  | 0.00  | 3.0  | Treat as zero by MCPB.py |
| M3-Z4-CR-NA | 3 | 0.00  | 0.00  | 3.0  | Treat as zero by MCPB.py |
| N -CX-2C-Y7 | 1 | 0.064 | 0.0   | -4.0 |                          |
| N -CX-2C-Y7 | 1 | 0.323 | 0.0   | -3.0 |                          |
| N -CX-2C-Y7 | 1 | 0.021 | 180.0 | -2.0 |                          |
| N -CX-2C-Y7 | 1 | 0.469 | 0.0   | 1.0  |                          |
| N -CX-2C-Y8 | 1 | 0.064 | 0.0   | -4.0 |                          |
| N -CX-2C-Y8 | 1 | 0.323 | 0.0   | -3.0 |                          |
| N -CX-2C-Y8 | 1 | 0.021 | 180.0 | -2.0 |                          |
| N -CX-2C-Y8 | 1 | 0.469 | 0.0   | 1.0  |                          |
| NA-CR-Y1-M1 | 3 | 0.00  | 0.00  | 3.0  | Treat as zero by MCPB.py |
| NA-CR-Y2-M1 | 3 | 0.00  | 0.00  | 3.0  | Treat as zero by MCPB.py |
| Y1-M1-Y2-CR | 3 | 0.00  | 0.00  | 3.0  | Treat as zero by MCPB.py |
| Y1-M1-Y2-CV | 3 | 0.00  | 0.00  | 3.0  | Treat as zero by MCPB.py |
| Y1-M1-Y3-cc | 3 | 0.00  | 0.00  | 3.0  | Treat as zero by MCPB.py |
| Y1-M1-Y3-cd | 3 | 0.00  | 0.00  | 3.0  | Treat as zero by MCPB.py |
| Y1-M1-Y4-cc | 3 | 0.00  | 0.00  | 3.0  | Treat as zero by MCPB.py |
| Y1-M1-Y4-cd | 3 | 0.00  | 0.00  | 3.0  | Treat as zero by MCPB.py |
| Y1-M1-Y5-cc | 3 | 0.00  | 0.00  | 3.0  | Treat as zero by MCPB.py |
| Y1-M1-Y5-cd | 3 | 0.00  | 0.00  | 3.0  | Treat as zero by MCPB.py |
| Y1-M1-Y6-cc | 3 | 0.00  | 0.00  | 3.0  | Treat as zero by MCPB.py |

|             |   |      |       |     |                          |
|-------------|---|------|-------|-----|--------------------------|
| Y1-M1-Y6-cd | 3 | 0.00 | 0.00  | 3.0 | Treat as zero by MCPB.py |
| Y2-M1-Y1-CV | 3 | 0.00 | 0.00  | 3.0 | Treat as zero by MCPB.py |
| Y2-M1-Y3-cc | 3 | 0.00 | 0.00  | 3.0 | Treat as zero by MCPB.py |
| Y2-M1-Y3-cd | 3 | 0.00 | 0.00  | 3.0 | Treat as zero by MCPB.py |
| Y2-M1-Y4-cc | 3 | 0.00 | 0.00  | 3.0 | Treat as zero by MCPB.py |
| Y2-M1-Y4-cd | 3 | 0.00 | 0.00  | 3.0 | Treat as zero by MCPB.py |
| Y2-M1-Y5-cc | 3 | 0.00 | 0.00  | 3.0 | Treat as zero by MCPB.py |
| Y2-M1-Y5-cd | 3 | 0.00 | 0.00  | 3.0 | Treat as zero by MCPB.py |
| Y2-M1-Y6-cc | 3 | 0.00 | 0.00  | 3.0 | Treat as zero by MCPB.py |
| Y2-M1-Y6-cd | 3 | 0.00 | 0.00  | 3.0 | Treat as zero by MCPB.py |
| Y3-M1-Y1-CV | 3 | 0.00 | 0.00  | 3.0 | Treat as zero by MCPB.py |
| Y3-M1-Y2-CV | 3 | 0.00 | 0.00  | 3.0 | Treat as zero by MCPB.py |
| Y4-M1-Y1-CV | 3 | 0.00 | 0.00  | 3.0 | Treat as zero by MCPB.py |
| Y4-M1-Y2-CV | 3 | 0.00 | 0.00  | 3.0 | Treat as zero by MCPB.py |
| Y4-cc-ce-cd | 1 | 1.0  | 180.0 | 2.0 | same as X -ce-ce-X       |
| Y5-M1-Y1-CV | 3 | 0.00 | 0.00  | 3.0 | Treat as zero by MCPB.py |
| Y5-M1-Y2-CV | 3 | 0.00 | 0.00  | 3.0 | Treat as zero by MCPB.py |
| Y5-cc-ce-cd | 1 | 1.0  | 180.0 | 2.0 | same as X -ce-ce-X       |
| Y6-M1-Y1-CV | 3 | 0.00 | 0.00  | 3.0 | Treat as zero by MCPB.py |
| Y6-M1-Y2-CV | 3 | 0.00 | 0.00  | 3.0 | Treat as zero by MCPB.py |
| Y6-cc-ce-cd | 1 | 1.0  | 180.0 | 2.0 | same as X -ce-ce-X       |
| Y6-cd-ce-cc | 1 | 1.0  | 180.0 | 2.0 | same as X -ce-ce-X       |
| Y7-M2-Y8-2C | 3 | 0.00 | 0.00  | 3.0 | Treat as zero by MCPB.py |
| Y7-M2-Z1-M3 | 3 | 0.00 | 0.00  | 3.0 | Treat as zero by MCPB.py |
| Y7-M2-Z3-M3 | 3 | 0.00 | 0.00  | 3.0 | Treat as zero by MCPB.py |
| Y8-M2-Z1-M3 | 3 | 0.00 | 0.00  | 3.0 | Treat as zero by MCPB.py |
| Y8-M2-Z3-M3 | 3 | 0.00 | 0.00  | 3.0 | Treat as zero by MCPB.py |
| Z1-M3-Z2-CR | 3 | 0.00 | 0.00  | 3.0 | Treat as zero by MCPB.py |
| Z1-M3-Z4-CR | 3 | 0.00 | 0.00  | 3.0 | Treat as zero by MCPB.py |
| Z2-M3-Z1-M2 | 3 | 0.00 | 0.00  | 3.0 | Treat as zero by MCPB.py |
| Z2-M3-Z3-M2 | 3 | 0.00 | 0.00  | 3.0 | Treat as zero by MCPB.py |
| Z2-M3-Z4-CC | 3 | 0.00 | 0.00  | 3.0 | Treat as zero by MCPB.py |
| Z2-M3-Z4-CR | 3 | 0.00 | 0.00  | 3.0 | Treat as zero by MCPB.py |
| Z3-M2-Z1-M3 | 3 | 0.00 | 0.00  | 3.0 | Treat as zero by MCPB.py |
| Z3-M3-Z2-CR | 3 | 0.00 | 0.00  | 3.0 | Treat as zero by MCPB.py |
| Z3-M3-Z4-CR | 3 | 0.00 | 0.00  | 3.0 | Treat as zero by MCPB.py |
| Z4-M3-Z1-M2 | 3 | 0.00 | 0.00  | 3.0 | Treat as zero by MCPB.py |
| Z4-M3-Z2-CR | 3 | 0.00 | 0.00  | 3.0 | Treat as zero by MCPB.py |
| Z4-M3-Z3-M2 | 3 | 0.00 | 0.00  | 3.0 | Treat as zero by MCPB.py |
| cc-Y3-M1-Y4 | 3 | 0.00 | 0.00  | 3.0 | Treat as zero by MCPB.py |
| cc-Y3-M1-Y5 | 3 | 0.00 | 0.00  | 3.0 | Treat as zero by MCPB.py |
| cc-Y3-M1-Y6 | 3 | 0.00 | 0.00  | 3.0 | Treat as zero by MCPB.py |
| cc-Y4-M1-Y3 | 3 | 0.00 | 0.00  | 3.0 | Treat as zero by MCPB.py |
| cc-Y4-M1-Y5 | 3 | 0.00 | 0.00  | 3.0 | Treat as zero by MCPB.py |
| cc-Y4-M1-Y6 | 3 | 0.00 | 0.00  | 3.0 | Treat as zero by MCPB.py |
| cc-Y5-M1-Y3 | 3 | 0.00 | 0.00  | 3.0 | Treat as zero by MCPB.py |
| cc-Y5-M1-Y4 | 3 | 0.00 | 0.00  | 3.0 | Treat as zero by MCPB.py |
| cc-Y5-M1-Y6 | 3 | 0.00 | 0.00  | 3.0 | Treat as zero by MCPB.py |
| cc-Y6-M1-Y3 | 3 | 0.00 | 0.00  | 3.0 | Treat as zero by MCPB.py |
| cc-Y6-M1-Y4 | 3 | 0.00 | 0.00  | 3.0 | Treat as zero by MCPB.py |
| cc-Y6-M1-Y5 | 3 | 0.00 | 0.00  | 3.0 | Treat as zero by MCPB.py |
| cc-ce-cd-Y3 | 1 | 1.0  | 180.0 | 2.0 | same as X -ce-ce-X       |
| cc-ce-cd-Y4 | 1 | 1.0  | 180.0 | 2.0 | same as X -ce-ce-X       |
| cc-ce-cd-Y5 | 1 | 1.0  | 180.0 | 2.0 | same as X -ce-ce-X       |
| cd-Y3-M1-Y4 | 3 | 0.00 | 0.00  | 3.0 | Treat as zero by MCPB.py |
| cd-Y3-M1-Y5 | 3 | 0.00 | 0.00  | 3.0 | Treat as zero by MCPB.py |
| cd-Y3-M1-Y6 | 3 | 0.00 | 0.00  | 3.0 | Treat as zero by MCPB.py |
| cd-Y4-M1-Y3 | 3 | 0.00 | 0.00  | 3.0 | Treat as zero by MCPB.py |
| cd-Y4-M1-Y5 | 3 | 0.00 | 0.00  | 3.0 | Treat as zero by MCPB.py |
| cd-Y4-M1-Y6 | 3 | 0.00 | 0.00  | 3.0 | Treat as zero by MCPB.py |
| cd-Y5-M1-Y3 | 3 | 0.00 | 0.00  | 3.0 | Treat as zero by MCPB.py |
| cd-Y5-M1-Y4 | 3 | 0.00 | 0.00  | 3.0 | Treat as zero by MCPB.py |

|             |   |      |       |     |                          |
|-------------|---|------|-------|-----|--------------------------|
| cd-Y5-M1-Y6 | 3 | 0.00 | 0.00  | 3.0 | Treat as zero by MCPB.py |
| cd-Y6-M1-Y3 | 3 | 0.00 | 0.00  | 3.0 | Treat as zero by MCPB.py |
| cd-Y6-M1-Y4 | 3 | 0.00 | 0.00  | 3.0 | Treat as zero by MCPB.py |
| cd-Y6-M1-Y5 | 3 | 0.00 | 0.00  | 3.0 | Treat as zero by MCPB.py |
| cd-cd-Y3-M1 | 3 | 0.00 | 0.00  | 3.0 | Treat as zero by MCPB.py |
| cd-cd-Y4-M1 | 3 | 0.00 | 0.00  | 3.0 | Treat as zero by MCPB.py |
| cd-cd-Y5-M1 | 3 | 0.00 | 0.00  | 3.0 | Treat as zero by MCPB.py |
| cd-cd-Y6-M1 | 3 | 0.00 | 0.00  | 3.0 | Treat as zero by MCPB.py |
| cd-ce-cc-Y3 | 1 | 1.0  | 180.0 | 2.0 | same as X -ce-ce-X       |
| ce-cc-Y3-M1 | 3 | 0.00 | 0.00  | 3.0 | Treat as zero by MCPB.py |
| ce-cc-Y4-M1 | 3 | 0.00 | 0.00  | 3.0 | Treat as zero by MCPB.py |
| ce-cc-Y5-M1 | 3 | 0.00 | 0.00  | 3.0 | Treat as zero by MCPB.py |
| ce-cc-Y6-M1 | 3 | 0.00 | 0.00  | 3.0 | Treat as zero by MCPB.py |
| ce-cd-Y3-M1 | 3 | 0.00 | 0.00  | 3.0 | Treat as zero by MCPB.py |
| ce-cd-Y4-M1 | 3 | 0.00 | 0.00  | 3.0 | Treat as zero by MCPB.py |
| ce-cd-Y5-M1 | 3 | 0.00 | 0.00  | 3.0 | Treat as zero by MCPB.py |
| ce-cd-Y6-M1 | 3 | 0.00 | 0.00  | 3.0 | Treat as zero by MCPB.py |
| ha-ce-cc-Y3 | 1 | 1.0  | 180.0 | 2.0 | same as X -ce-ce-X       |
| ha-ce-cc-Y4 | 1 | 1.0  | 180.0 | 2.0 | same as X -ce-ce-X       |
| ha-ce-cc-Y5 | 1 | 1.0  | 180.0 | 2.0 | same as X -ce-ce-X       |
| ha-ce-cc-Y6 | 1 | 1.0  | 180.0 | 2.0 | same as X -ce-ce-X       |
| ha-ce-cd-Y3 | 1 | 1.0  | 180.0 | 2.0 | same as X -ce-ce-X       |
| ha-ce-cd-Y4 | 1 | 1.0  | 180.0 | 2.0 | same as X -ce-ce-X       |
| ha-ce-cd-Y5 | 1 | 1.0  | 180.0 | 2.0 | same as X -ce-ce-X       |
| ha-ce-cd-Y6 | 1 | 1.0  | 180.0 | 2.0 | same as X -ce-ce-X       |

#### IMPR

|             |     |       |     |                     |
|-------------|-----|-------|-----|---------------------|
| CT-CW-CC-Z2 | 1.1 | 180.  | 2.  |                     |
| Y3-cd-cd-ce | 1.1 | 180.0 | 2.0 | Using default value |
| Y4-cd-cd-ce | 1.1 | 180.0 | 2.0 | Using default value |
| CT-CW-CC-Z4 | 1.1 | 180.  | 2.  |                     |
| Y6-cc-cc-ce | 1.1 | 180.0 | 2.0 | Using default value |
| Y6-cd-cd-ce | 1.1 | 180.0 | 2.0 | Using default value |
| Y4-cc-cc-ce | 1.1 | 180.0 | 2.0 | Using default value |
| Y5-cd-cd-ce | 1.1 | 180.0 | 2.0 | Using default value |
| Y5-cc-cc-ce | 1.1 | 180.0 | 2.0 | Using default value |
| Y3-cc-cc-ce | 1.1 | 180.0 | 2.0 | Using default value |

#### NONB

|    |        |              |  |                                          |
|----|--------|--------------|--|------------------------------------------|
| M1 | 1.4090 | 0.0172100000 |  | IOD set for Fe2+ ion from Li et al. 2013 |
| M2 | 1.4090 | 0.0172100000 |  | IOD set for Fe2+ ion from Li et al. 2013 |
| M3 | 1.4090 | 0.0172100000 |  | IOD set for Fe2+ ion from Li et al. 2013 |
| Y1 | 1.8240 | 0.1700       |  | OPLS                                     |
| Y2 | 1.8240 | 0.1700       |  | OPLS                                     |
| Y7 | 2.0000 | 0.2500       |  | W. Cornell CH3SH and CH3SCH3 FEP's       |
| Z2 | 1.8240 | 0.1700       |  | OPLS                                     |
| Y8 | 2.0000 | 0.2500       |  | W. Cornell CH3SH and CH3SCH3 FEP's       |
| Z4 | 1.8240 | 0.1700       |  | OPLS                                     |
| Y3 | 1.8240 | 0.1700       |  | OPLS                                     |
| Y4 | 1.8240 | 0.1700       |  | OPLS                                     |
| Y5 | 1.8240 | 0.1700       |  | OPLS                                     |
| Y6 | 1.8240 | 0.1700       |  | OPLS                                     |
| Z1 | 2.0000 | 0.2500       |  | same as s                                |
| Z3 | 2.0000 | 0.2500       |  | same as s                                |

**Table S5:** Derived metal force-field parameters. Comparison of Fe<sup>2+</sup> bond distance (between Fe<sup>2+</sup> metal and its interacting residues) among template structure, force field parameters and post-MD (A) Heme bL and (B) [2FE-2S] cluster located in both PfCytb and ISP chains, respectively.

| <b>A</b>                           |                            |                                  |                                                                    |                 |
|------------------------------------|----------------------------|----------------------------------|--------------------------------------------------------------------|-----------------|
| <b>Bond distance (Å): Heme bL</b>  |                            |                                  |                                                                    |                 |
|                                    | <b>Template<br/>(1PP9)</b> | <b>QM derived<br/>parameters</b> | <b>Force constants<br/>(kcal/ mol<sup>-1</sup> Å<sup>-2</sup>)</b> | <b>Post-MD</b>  |
| <b>FE<sub>1</sub>- NA</b>          | 1.970                      | 2.0073                           | 55.9                                                               | 2.0387±0.00591* |
| <b>FE<sub>1</sub>- NB</b>          | 2.032                      | 2.0251                           | 44.2                                                               | 2.0479±0.00585* |
| <b>FE<sub>1</sub>- NC</b>          | 1.927                      | 2.0276                           | 46.2                                                               | 2.0745±0.00581* |
| <b>FE<sub>1</sub>- ND</b>          | 2.007                      | 2.0069                           | 64.2                                                               | 2.0275±0.00583* |
| <b>FE<sub>1</sub>-NE2 (His78)</b>  | 2.005                      | 2.0205                           | 42.7                                                               | 2.0546±0.00580* |
| <b>FE<sub>1</sub>-NE2 (His173)</b> | 2.003                      | 2.0146                           | 43.0                                                               | 2.0831±0.00581* |
| <b>B</b>                           |                            |                                  |                                                                    |                 |
| <b>Bond distance (Å): [2FE-2S]</b> |                            |                                  |                                                                    |                 |
|                                    | <b>Template<br/>(1PP9)</b> | <b>QM derived<br/>parameters</b> | <b>Force constants<br/>(kcal/mol<sup>-1</sup> Å<sup>-2</sup>)</b>  | <b>Post-MD</b>  |
| <b>FE<sub>3</sub>-SG (Cys299)</b>  | 2.279                      | 2.1410                           | 131.0                                                              | 2.1199±0.00573* |
| <b>FE<sub>2</sub>-ND1 (His301)</b> | 2.139                      | 2.2053                           | 32.8                                                               | 2.1507±0.00582* |
| <b>FE<sub>3</sub>-SG (Cys317)</b>  | 2.225                      | 2.1544                           | 118.6                                                              | 2.1234±0.00583* |
| <b>FE<sub>2</sub>-ND1 (His320)</b> | 2.147                      | 1.9660                           | 74.0                                                               | 1.9311±0.00576* |

\*350 ns MD simulation values provided as an average ± 1 standard deviation

**Table S6.** Table of residues having high *Betweenness Centrality* (BC) values in ATQ-bound protein systems (WT, Y268C, Y268N and Y268S) to assess effect of mutation; + significant positive values while – stands for significant negative values. Active site residues are shown in bold, common residues in all systems (Bold#) and common residues in at least two runs (Bold\*). A threshold value of +/- 2 SD of the BC values was used for each system.

| <i>Betweenness Centrality</i> (BC); Significant Residues |   |                                                                                                                                                                                                                                                                                                                                                                                                                                  |                                                                                                                                                                                                                                                                                                                                                                                                           |                                                                                                                                                                                                                                                                                                                                                                                                       |
|----------------------------------------------------------|---|----------------------------------------------------------------------------------------------------------------------------------------------------------------------------------------------------------------------------------------------------------------------------------------------------------------------------------------------------------------------------------------------------------------------------------|-----------------------------------------------------------------------------------------------------------------------------------------------------------------------------------------------------------------------------------------------------------------------------------------------------------------------------------------------------------------------------------------------------------|-------------------------------------------------------------------------------------------------------------------------------------------------------------------------------------------------------------------------------------------------------------------------------------------------------------------------------------------------------------------------------------------------------|
| Mutant systems                                           |   | RUN_1                                                                                                                                                                                                                                                                                                                                                                                                                            | RUN_2                                                                                                                                                                                                                                                                                                                                                                                                     | RUN_3                                                                                                                                                                                                                                                                                                                                                                                                 |
| WT                                                       | + | <p><b>PfCytb Chain:</b> Ser_83, Val_85, Phe_86, Thr_89, Leu_112, Ile_117, Phe_118, Ala_122, <b>Tyr_126</b>, Val_127, <b>Gly_137</b>, Thr_139, Asn_250, Val_259*, <b>Pro_260</b>, <b>Glu_261</b>, <b>Tyr_263</b>, <b>Phe_264*</b>, <b>Leu_271</b>, Lys_277, Gly_280, Leu_291</p> <p><b>ISP Chain:</b> Gly_297, Ile_298, <b>Cys_299*</b>, <b>His_301*</b>, Gly_303, <b>His_320*</b>, Ile_330, Ala_335</p> <p><b>ISP Chain:</b></p> | <p><b>PfCytb Chain:</b> Ser_83, Val_85, Thr_89, Ala_122, <b>Phe_123</b>, Val_127, Thr_139, Thr_160, Thr_165, <b>Phe_169*</b>, <b>Trp_262</b>, Leu_265, Ala_269, Met_270, <b>Leu_271</b>, Lys_272, Cys_324</p> <p><b>ISP Chain:</b> Lys_252, Ile_296, Gly_297, Ile_298, Leu_302, <b>His_320*</b>, Ser_322</p>                                                                                              | <p><b>PfCytb Chain:</b> Val_85, Leu_88, Arg_95, Thr_121, <b>Val_124</b>, Val_127, <b>Phe_169*</b>, Ile_237, Ser_241, His_242, Thr_254, <b>Ile_258</b>, <b>Val_259*</b>, <b>Phe_264*</b>, Leu_265, <b>Tyr_268</b>, Val_274, Lys_277, Gly_280, Leu_281, Val_284, Ser_287, Leu_290, Leu_291 <b>ISP Chain:</b> Gly_297, <b>Cys_299*</b>, <b>His_301*</b>, Gly_303, Val_305, Ile_330, Pro_334, Ala_335</p> |
| Y268C                                                    | + | <p><b>PfCytb Chain:</b> Ser_83, Val_85, Thr_89, Tyr_99, Leu_112, Phe_118, Ala_122, <b>Phe_123*</b>, <b>Val_124*</b>, Thr_139, <b>Ile_141</b>, Ser_162, <b>Tyr_263*</b>, <b>Phe_264#</b>, <b>Leu_271*</b>, Lys_272, Lys_277, Val_284</p> <p><b>ISP Chain:</b> Leu_226, Ile_298, <b>His_301#</b>, Leu_302, Gly_303, <b>His_320#</b>, Ser_322, Ile_330</p>                                                                          | <p><b>PfCytb Chain:</b> Ala_82, Val_85, Arg_95, Phe_118, Thr_121, Ala_122, <b>Phe_123*</b>, <b>Val_124*</b>, Val_127, Ala_138, Thr_160, Thr_165, Arg_168, <b>Phe_169</b>, <b>Leu_172</b>, Leu_176, <b>Phe_264#</b>, <b>Leu_271*</b>, Lys_272, Lys_277, Leu_281, Ile_320</p> <p><b>ISP Chain:</b> Lys_252, <b>His_301#</b>, Leu_302, Gly_303, <b>His_320#</b>, Ser_322, Ile_330</p>                        | <p><b>PfCytb Chain:</b> Ser_83, Thr_89, Leu_112, Phe_118, Thr_121, Ala_122, Tyr_126, Val_127, <b>Met_133</b>, <b>Gly_137</b>, Thr_139, Pro_255, <b>Pro_260</b>, <b>Tyr_263*</b>, <b>Phe_264#</b>, <b>Cys_268</b>, Lys_272, Lys_277, Leu_288</p> <p><b>ISP Chain:</b> Gly_297, Ile_298, <b>His_301#</b>, Gly_303, Val_305, <b>His_320#</b>, Ser_322, Ile_330</p>                                       |
| Y268N                                                    | + | <p><b>PfCytb Chain:</b> Ser_83, Val_85, Phe_86, Thr_89, Leu_112, Val_127, <b>Met_133*</b>, Tyr_252, Thr_254, <b>Ile_258</b>, <b>Val_259</b>, <b>Pro_260</b>, <b>Tyr_263*</b>, <b>Phe_264*</b>, <b>Asn_268*</b>, Lys_272, Lys_277</p> <p><b>ISP Chain:</b> Gly_297, <b>His_301*</b>, Leu_302, Val_305, <b>His_320#</b>, Ser_322, Ile_330</p>                                                                                      | <p><b>PfCytb Chain:</b> Val_85, Phe_86, Thr_89, Leu_112, Phe_118, <b>Ile_119</b>, Ala_122, Ser_134, Asn_143, Val_249, <b>Tyr_263*</b>, <b>Phe_264*</b>, <b>Asn_268*</b>, Ala_269, Lys_272, Lys_277</p> <p><b>ISP Chain:</b> Ile_298, <b>His_301*</b>, Leu_302, Gly_303, <b>His_320#</b>, Ser_322, Ile_330</p>                                                                                             | <p><b>PfCytb Chain:</b> Leu_112, Ala_122, <b>Phe_123</b>, <b>Val_124</b>, Tyr_126, Val_127, <b>Met_133*</b>, Ser_134, <b>Trp_136</b>, Thr_139, Ile_237, Ser_241, His_242, Phe_264, Met_270, <b>Leu_271</b>, Lys_272, Leu_281</p> <p><b>ISP Chain:</b> Gly_297, Ile_298, Gly_303, <b>His_320#</b>, Ser_322, Ile_330, Pro_334, Ala_335</p>                                                              |
| Y268S                                                    | + | <p><b>PfCytb Chain:</b> Ser_83, Val_85, Phe_86, Thr_89, Ile_93, Leu_97, Leu_112, Ala_122, <b>Phe_123*</b>, <b>Val_140*</b>, <b>Ile_141</b>, <b>Ile_258</b>, <b>Trp_262</b>, <b>Phe_264#</b>, Leu_265, <b>Ser_268*</b>, Lys_272, Leu_288</p> <p><b>ISP Chain:</b> Gly_297, Ile_298, <b>His_301*</b>, Gly_303, Val_305, <b>His_320#</b>, Ser_322</p>                                                                               | <p><b>PfCytb Chain:</b> Val_85, Phe_86, Thr_89, Arg_95, Phe_118, Thr_121, <b>Val_124</b>, Val_127, <b>Gly_137*</b>, <b>Val_140*</b>, Thr_160, Val_161, Thr_165, <b>Phe_169</b>, <b>Tyr_263*</b>, <b>Phe_264#</b>, <b>Ser_268*</b>, <b>Leu_271</b>, Lys_272, Lys_277, Leu_281, Gln_289, Leu_290, Phe_292</p> <p><b>ISP Chain:</b> Lys_252, <b>His_301*</b>, Leu_302, <b>His_320#</b>, Ser_322, Ile_330</p> | <p><b>PfCytb Chain:</b> Ala_82, Val_85, Phe_86, Thr_89, Leu_112, Ala_122, <b>Phe_123*</b>, <b>Trp_136</b>, <b>Gly_137*</b>, Thr_142, Asn_143, Thr_160, Thr_165, <b>Tyr_263*</b>, <b>Phe_264#</b>, Lys_272, Leu_290, Leu_294 <b>ISP Chain:</b> Gly_297, Ile_298, Leu_302, Val_305, <b>His_320#</b>, Pro_336</p>                                                                                        |

**Table S7.** Table of residues having significant changes in *Betweenness Centrality* ( $\Delta BC$ ) in three Holo mutant systems to assess effect of mutation; + significant positive values while – stands for significant negative values. Active site residues are shown in bold, common residues in all systems (Bold#) and common residues in at least two runs (Bold\*). A threshold value of +/- 2 SD of the  $\Delta BC$  values was used for each system.

| <i>Betweenness Centrality</i> ( $\Delta BC$ ); (WT– Mutant); Significant Residues |   |                                                                                                                                                                                                                                   |                                                                                                                                                                                                                                  |                                                                                                                                                                                                                         |
|-----------------------------------------------------------------------------------|---|-----------------------------------------------------------------------------------------------------------------------------------------------------------------------------------------------------------------------------------|----------------------------------------------------------------------------------------------------------------------------------------------------------------------------------------------------------------------------------|-------------------------------------------------------------------------------------------------------------------------------------------------------------------------------------------------------------------------|
| Mutant systems                                                                    |   | RUN_1                                                                                                                                                                                                                             | RUN_2                                                                                                                                                                                                                            | RUN_3                                                                                                                                                                                                                   |
| Y268C                                                                             | + | <b>PfCytb chain:</b> Ser_83, Ile_93, Asn_143, <b>Trp_262#</b> , Leu_265, <b>Cys_268</b> , Lys_272, Val_274, Ile_283, Leu_288<br><b>ISP chain:</b> Trp_221, Ile_222, Ile_298, Leu_302, His_320, Ser_322, Ile_330                   | <b>PfCytb chain:</b> Trp_26, Tyr_101, Met_102, Phe_115, <b>Ile_119*</b> , <b>Val_124</b> , Thr_160, Gln_257, <b>Ile_258</b> , <b>Val_259</b> , <b>Trp_262#</b> , Leu_265, Leu_291<br><b>ISP chain:</b> Val_227                   | <b>PfCytb chain:</b> Leu_25, Leu_94, <b>Ile_119*</b> , Ala_122, <b>Phe_123</b> , <b>Trp_136</b> , <b>Ile_141</b> , Ile_237, Ser_241, <b>Trp_262#</b> , Leu_265, Thr_301, Trp_331, Val_305                               |
|                                                                                   | - | <b>PfCytb chain:</b> Phe_86, Met_102, Phe_118, Ala_122, <b>Phe_123*</b> , Thr_160, Val_161, His_187, Gln_232, <b>Glu_261</b>                                                                                                      | <b>PfCytb chain:</b> Leu_94, <b>Val_120</b> , <b>Phe_123*</b> , Ala_138, Thr_139, <b>Val_140</b> , <b>Ile_141</b> , Ser_241, Val_249, Tyr_263, Gln_289, Leu_290, Cys_324, Leu_357<br><b>ISP chain:</b> Ser_223, Cys_304, Pro_334 | <b>PfCytb chain:</b> Tyr_99, Leu_112, <b>Ile_155</b> , Thr_160, Thr_165, Arg_168, Leu_240, Asp_244, Tyr_252, Gln_257, <b>Phe_264</b> , Lys_252, Leu_302                                                                 |
| Y268N                                                                             | + | <b>PfCytb chain:</b> Ser_83, Ala_122, <b>Phe_123*</b> , <b>Val_140*</b> , <b>Ile_141*</b> , Asn_143, <b>Leu_144</b> , <b>Trp_262#</b> , Leu_265, <b>Asn_268</b> , Lys_272, Ile_309<br><b>ISP chain:</b> Trp_221, Ile_222, Leu_302 | <b>PfCytb chain:</b> Trp_26, Phe_118, Ala_122, Thr_197, Ile_247, Thr_251, Gln_257, <b>Ile_258</b> , <b>Val_259</b> , <b>Trp_262#</b> , Lys_277, Leu_281, Leu_291<br><b>ISP chain:</b> Ile_222, Ile_298, Cys_304, Pro_318         | <b>PfCytb chain:</b> Phe_118, Ala_122, <b>Phe_123*</b> , <b>Trp_136</b> , <b>Val_140*</b> , <b>Ile_141*</b> , Thr_160, Ser_162, Ile_237, <b>Trp_262#</b> , Leu_265, Leu_294, Val_305                                    |
|                                                                                   | - | <b>PfCytb chain:</b> Phe_86, <b>Val_124</b> , Thr_160, Phe_169, Ile_237, Ser_241, His_242, Asn_250, Tyr_263, <b>Phe_264#</b> , Lys_277, Leu_357                                                                                   | <b>PfCytb chain:</b> Ser_241, His_242, Val_253, Thr_254, <b>Pro_260*</b> , Tyr_263, <b>Phe_264#</b> , <b>Asn_268</b> , Ile_342, Pro_334, Pro_336                                                                                 | <b>PfCytb chain:</b> Phe_30, His_92, Leu_112, Ile_155, Leu_172, Leu_176, Leu_215, Tyr_252, <b>Pro_260*</b> , <b>Phe_264#</b> , Val_274, Leu_288, Gly_303, Pro_334, Pro_336                                              |
| Y268S                                                                             | + | <b>PfCytb chain:</b> Thr_80, Ser_83, Asn_143, Tyr_252, <b>Trp_262#</b> , Leu_265, <b>Ser_268</b> , Lys_272, Leu_281, Leu_288, Leu_290, Leu_291<br><b>ISP chain:</b> Ile_222, Leu_302, His_320*, Ile_330                           | <b>PfCytb chain:</b> Tyr_101, Met_102, Phe_115, <b>Ile_119*</b> , Thr_197, Thr_251, Gln_257, <b>Ile_258</b> , <b>Val_259*</b> , <b>Glu_261</b> , <b>Trp_262#</b> , <b>Phe_264</b> , Lys_277, Leu_291, Leu_294, Cys_304           | <b>PfCytb chain:</b> Leu_25, Ala_82, <b>Ile_119*</b> , Ala_122, <b>Phe_123</b> , Gly_131, <b>Trp_136</b> , Ile_237, Asn_250, <b>Val_259*</b> , <b>Trp_262#</b> , Leu_265<br><b>ISP chain:</b> Ile_222, His_320*         |
|                                                                                   | - | <b>PfCytb chain:</b> Ile_35, Val_85, Phe_86, Thr_89, Met_102, Trp_108, <b>Val_120</b> , <b>Leu_145</b> , Ser_146, Tyr_159, Thr_160, <b>Pro_260</b> , <b>Glu_261</b> , <b>Leu_271</b> , Cys_304, Pro_318                           | <b>PfCytb chain:</b> Tyr_16, Val_127, <b>Trp_136</b> , Asn_143, Ser_146, Ile_188, Ser_241, His_242, <b>Tyr_263*</b> , Cys_324, Cys_319*                                                                                          | <b>PfCytb chain:</b> Ser_83, Thr_121, Ala_138, Thr_139, <b>Ile_155</b> , <b>Tyr_263*</b> , <b>Phe_264</b> , <b>Phe_267</b> , <b>Ser_268</b> , Val_274<br><b>ISP chain:</b> Leu_226, Cys_304, Cys_319*, Gly_321, Pro_334 |



**Table S8.** Table of residues having significant changes in *Betweenness Centrality* ( $\Delta BC$ ) in three ATQ-bound mutant systems to assess effect of mutation; + significant positive values while – stands for significant negative values. Active site residues are shown in bold, common residues in all systems (Bold#) and common residues in at least two runs (Bold\*). A threshold value of +/- 2 SD of the  $\Delta BC$  values was used for each system.

| <i>Betweenness Centrality</i> ( $\Delta BC$ ); (WT– Mutant); Significant Residues |   |                                                                                                                                                                                                                                                                                                             |                                                                                                                                                                                                                                                       |                                                                                                                                                                                                                                        |
|-----------------------------------------------------------------------------------|---|-------------------------------------------------------------------------------------------------------------------------------------------------------------------------------------------------------------------------------------------------------------------------------------------------------------|-------------------------------------------------------------------------------------------------------------------------------------------------------------------------------------------------------------------------------------------------------|----------------------------------------------------------------------------------------------------------------------------------------------------------------------------------------------------------------------------------------|
| Mutant systems                                                                    |   | RUN_1                                                                                                                                                                                                                                                                                                       | RUN_2                                                                                                                                                                                                                                                 | RUN_3                                                                                                                                                                                                                                  |
| Y268C                                                                             | + | <b>PfCytb Chain:</b> Phe_86, Arg_95, Val_127, <b>Gly_137</b> , Thr_139, Pro_164, Arg_168, <b>His_187</b> , <b>Val_259*</b> , <b>Pro_260</b> , <b>Glu_261</b> , <b>Phe_264</b> , Lys_277, Gly_280, Leu_291<br><b>ISP Chain:</b> Ile_298, <b>Cys_299</b> , <b>His_301</b> , Gly_303, <b>Cys_319</b> , Ala_335 | <b>PfCytb Chain:</b> Leu_25, Ser_83, Phe_86, Tyr_90, Thr_139, <b>Ile_141</b> , Cys_156, Pro_164, Leu_191, His_242, Asp_244, <b>Trp_262</b> , Leu_265, Ala_269, Met_270, Lys_272, Cys_324, Tyr_363<br><b>ISP Chain:</b> Trp_221, Ile_298               | <b>PfCytb Chain:</b> Ile_155, Thr_160, <b>Phe_169</b> , Ile_237, Ser_241, His_242, Thr_254, <b>Ile_258</b> , <b>Val_259*</b> , Leu_265, Thr_273, Val_274, Gly_280, Leu_281, Ser_287, Pro_334, Ala_335                                  |
|                                                                                   | - | <b>PfCytb Chain:</b> Tyr_99, <b>Met_116</b> , <b>Phe_123</b> , <b>Trp_136</b> , <b>Ile_141</b> , <b>Leu_144</b> , Ser_162, Ser_196, Ser_241, Ser_287<br><b>ISP Chain:</b> Leu_226, Lys_252, Leu_302, Ser_322                                                                                                | <b>PfCytb Chain:</b> Asn_27, Leu_31, Arg_95, Met_102, Phe_118, Ala_122, Thr_160, <b>Leu_172</b> , Ala_246, <b>Phe_264*</b> , Lys_277, Leu_281, <b>Leu_285</b> , Gln_289, Ile_320<br><b>ISP Chain:</b> Phe_219, Gly_251, Lys_252, <b>His_301</b>       | <b>PfCytb Chain:</b> Ser_83, Thr_89, Ala_122, <b>Phe_264*</b> , Leu_271, Lys_272, Tyr_327, Pro_337<br><b>ISP Chain:</b> <b>His_320</b> , Gly_321, Ser_322                                                                              |
| Y268N                                                                             | + | <b>PfCytb Chain:</b> Tyr_16, Ala_122, <b>Gly_137</b> , Thr_139, Ile_247, Leu_271, Pro_337, Ile_298, Gly_303, Ala_335                                                                                                                                                                                        | <b>PfCytb Chain:</b> Ser_83, Thr_139, Thr_160, Ser_162, Pro_164, Thr_165, <b>Trp_262</b> , Leu_265, Met_270, Leu_271, Cys_324, Gly_333<br><b>ISP Chain:</b> Trp_221                                                                                   | <b>PfCytb Chain:</b> Tyr_28, Val_85, Leu_88, Thr_160, <b>Phe_169</b> , Asn_245, <b>Ile_258</b> , <b>Val_259</b> , Val_274, Pro_275, Ser_276, Lys_277, Gly_280, Ser_287, Leu_294, Ile_309<br><b>ISP Chain:</b> <b>His_301</b> , Val_305 |
|                                                                                   | - | <b>PfCytb Chain:</b> Leu_94, <b>Met_133</b> , Ser_241, His_242, Tyr_252, Thr_254, <b>Ile_258</b> , Lys_272<br><b>ISP Chain:</b> Val_305, <b>His_320*</b> , Ser_322                                                                                                                                          | <b>PfCytb Chain:</b> Phe_86, <b>His_92</b> , Phe_118, Gly_131, <b>His_192*</b> , Asn_245, Val_249, Tyr_252, <b>Tyr_263</b> , <b>Phe_264</b> , <b>Tyr_268</b> , Pro_278<br><b>ISP Chain:</b> <b>His_301</b> , Gly_303                                  | <b>PfCytb Chain:</b> Ala_122, <b>Trp_136</b> , Ser_147, <b>Leu_172</b> , <b>His_187</b> , <b>His_192*</b> , <b>Leu_271</b> , Lys_272<br><b>ISP Chain:</b> Cys_324, <b>His_320*</b> , Ser_322, Pro_334, Pro_336                         |
| Y268S                                                                             | + | <b>PfCytb Chain:</b> Arg_95, <b>Gly_137</b> , Thr_139, Ile_247, <b>Pro_260</b> , <b>Phe_264</b> , Lys_277, Leu_291<br><b>ISP Chain:</b> Ile_298, <b>His_301*</b> , Gly_303, <b>Cys_319</b> , Ala_335                                                                                                        | <b>PfCytb Chain:</b> Leu_25, Ala_122, <b>Phe_123</b> , Thr_139, Pro_164, Ile_188, <b>Trp_262</b> , Leu_265, Ala_269, Lys_272, Leu_288, Cys_324, Ala_328<br><b>ISP Chain:</b> Ile_298, Leu_302                                                         | <b>PfCytb Chain:</b> <b>Val_124</b> , Val_127, <b>Phe_169</b> , Ile_237, Ser_241, His_242, Thr_254, Pro_255, <b>Ile_258</b> , <b>Val_259</b> , Leu_265, Val_274, Lys_277, Gly_280, Leu_291<br><b>ISP Chain:</b> <b>His_301*</b>        |
|                                                                                   | - | <b>PfCytb Chain:</b> Thr_89, Ile_93, Leu_97, <b>Phe_123*</b> , <b>Met_133</b> , <b>Val_140</b> , <b>Ile_141</b> , Thr_160, Ser_241, <b>Trp_262</b> , Leu_265, Cys_304, Ser_322                                                                                                                              | <b>PfCytb Chain:</b> Phe_86, Arg_95, Leu_97, Met_102, <b>Gly_137</b> , <b>Val_140</b> , <b>Leu_144</b> , Val_161, Ser_241, <b>Tyr_263</b> , <b>Phe_264</b> , Lys_277, Leu_281, Leu_285, Gln_289, Leu_290, Phe_292<br><b>ISP Chain:</b> <b>His_301</b> | <b>PfCytb Chain:</b> Phe_86, Thr_89, Ala_122, <b>Phe_123*</b> , <b>Trp_136</b> , <b>Thr_142</b> , Asn_143, Gly_195, <b>Tyr_263*</b> , Lys_272<br><b>ISP Chain:</b> Tyr_327, Pro_337, <b>His_320</b> , Pro_336                          |

**Table S9.** Residues having significant changes in average shortest path ( $\Delta L$ ) in three Holo mutant systems to assess effect of mutation ; + significant positive values while – stands for significant negative values. Interfacing residues in Bold, common residues in all systems (Bold#) and common residues in at least two runs (Bold\*). A threshold value of +/- 2 SD of the  $\Delta L$  values was used for each system.

| Average Shortest Path ( $\Delta L$ ); (WT– Mutant); Significant Residues |   |                                                                                                                                                                                                                                                                 |                                                                                                                                                                                                                                     |                                                                                                                                                                                                                                                |
|--------------------------------------------------------------------------|---|-----------------------------------------------------------------------------------------------------------------------------------------------------------------------------------------------------------------------------------------------------------------|-------------------------------------------------------------------------------------------------------------------------------------------------------------------------------------------------------------------------------------|------------------------------------------------------------------------------------------------------------------------------------------------------------------------------------------------------------------------------------------------|
| Mutant systems                                                           |   | RUN_1:                                                                                                                                                                                                                                                          | RUN_2                                                                                                                                                                                                                               | RUN_3                                                                                                                                                                                                                                          |
| Y268C                                                                    | + | <b>PfCytb chain:</b> Arg_298<br><b>ISP chain:</b> Val_227, <b>Ala_228*</b> ,<br><b>Gly_229</b> , Gly_251, Lys_272,<br>Leu_273, Thr_276                                                                                                                          | <b>PfCytb chain:</b> Pro_17, Pro_19,<br>Leu_20, Asn_23, Leu_25, Leu_94,<br>Asn_98, Ile_237, Ser_241, His_242,<br>Pro_243, Asn_245, Lys_307, Leu_357,<br>Tyr_368<br><b>ISP chain:</b> Lys_215                                        | <b>PfCytb chain:</b> Asn_15, Tyr_16,<br>Ala_151, Gly_201, Arg_298, Phe_306,<br>Lys_307, Met_308, Ile_309, Phe_310,<br><b>ISP chain:</b> Leu_226, <b>Ala_228*</b> ,<br><b>Gly_229</b> , Glu_262, Asp_263, Arg_266,<br>Lys_272, Leu_273, Thr_276 |
|                                                                          | - | <b>PfCytb chain:</b> Gly_221, Phe_222,<br>Asn_223, Val_225, Ile_226, Phe_229,<br>Leu_230, Ser_233, Leu_234,<br>Gly_311, Ala_312<br><b>ISP chain:</b> Cys_214, Ser_216,<br>Val_217, His_218, <b>Trp_221</b>                                                      | <b>PfCytb chain:</b> Thr_302, Gln_373,<br>Ala_374, Asn_375<br><b>ISP chain:</b> <b>Ile_222*</b> , Lys_224,<br>Val_227, Ala_228, Gly_251                                                                                             | <b>PfCytb chain:</b> Leu_25, Ala_328<br><b>ISP chain:</b> Phe_219, Phe_220,<br><b>Trp_221</b> , <b>Ile_222*</b> , Lys_224                                                                                                                      |
| Y268N                                                                    | + | <b>PfCytb chain:</b> Ala_205, Ser_241,<br>His_242, Asn_375<br><b>ISP chain:</b> Leu_273, Thr_276                                                                                                                                                                | <b>PfCytb chain:</b> Asn_224, Phe_235,<br>Gly_236, Ile_237, Ile_238, Ser_241,<br>His_242, Pro_243, Asp_244, Asn_245,<br>Thr_254,<br><b>ISP chain:</b> Lys_215, Ser_216, Val_217,<br>Thr_276, Glu_349                                | <b>PfCytb chain:</b> Ala_151, Leu_200,<br>Leu_215, Ile_304<br><b>ISP chain:</b> Cys_214, Ala_228,<br>Glu_262, Asp_263, Gln_265, Arg_266,<br>Ala_267, Lys_268, Glu_269                                                                          |
|                                                                          | - | <b>PfCytb chain:</b> Asn_15, Ser_147,<br>Lys_207, Met_308, Ile_309, Phe_310,<br>Gly_311, Asp_314, His_367,<br>Asp_369, Tyr_370,<br><b>ISP chain:</b> Cys_214, Lys_215,<br>Ser_216, Val_217, His_218, Phe_220,<br><b>Trp_221#</b> , Gln_265, Arg_266,<br>Glu_269 | <b>PfCytb chain:</b> Ser_147, Gly_195,<br>Ser_196, Ala_312, Arg_313, Gln_373,<br>Ala_374, Asn_375<br><b>ISP chain:</b> <b>Trp_221#</b> , <b>Ile_222*</b> ,<br>Ser_223, Lys_224, Glu_262, Asp_263                                    | <b>PfCytb chain:</b> Lys_207, Asn_224,<br>Val_225, Leu_228, Ile_231, Gln_232,<br>Ile_237, Pro_239, Leu_240, Lys_307,<br>Met_308, Ile_309<br><b>ISP chain:</b> Val_217, <b>Trp_221#</b> ,<br><b>Ile_222*</b> , Leu_234                          |
| Y268S                                                                    | + | <b>PfCytb chain:</b> Phe_235, Gly_236,<br>Pro_239, Asp_270, Gln_275                                                                                                                                                                                             | <b>PfCytb chain:</b> Asn_15, Tyr_16,<br>Pro_17, Pro_19, Leu_206, Ile_208,<br>Pro_209, Phe_210, Asn_213, Gly_236,<br>Ile_237, Ile_238, Ser_241, His_242,<br>Pro_243, Asp_244, Asn_245<br><b>ISP chain:</b> Lys_215, Ser_223, Glu_349 | <b>PfCytb chain:</b> Ser_147, Val_150,<br>Ala_151, Phe_306, Lys_307, Met_308,<br>Ile_309, Phe_310<br><b>ISP chain:</b> Cys_214, Lys_215, Ser_216,<br>Leu_226, Val_227                                                                          |
|                                                                          | - | <b>PfCytb chain:</b> Asn_15, Tyr_16,<br>Pro_199, Ile_304, Ile_309, Phe_310,<br>Gly_311, Asp_314, Ser_316<br><b>ISP chain:</b> Cys_214, Lys_215,<br>His_218                                                                                                      | <b>PfCytb chain:</b> Ile_22, Gly_195,<br>Ser_196, Thr_197, Asn_198, Pro_199,<br>Leu_200, Leu_215, Gln_257, Gln_297,<br>Arg_298, Ser_299, Met_308, Ile_309,<br>Phe_310, Ser_371, Gln_373, Asn_375<br><b>ISP chain:</b> Val_227       | <b>PfCytb chain:</b> Leu_25, Asp_203,<br>Val_248, Asn_250, Thr_251, Tyr_252,<br>Ile_340<br><b>ISP chain:</b> <b>Ile_222</b>                                                                                                                    |

**Table S10.** Residues having significant changes in average shortest path ( $\Delta L$ ) in three ATQ-bound mutant systems to assess effect of mutation ; + significant positive values while – stands for significant negative values. Interfacing residues in Bold, common residues in all systems (Bold#) and common residues in at least two runs (Bold\*). A threshold value of +/- 2 SD of the  $\Delta L$  values was used for each system.

| Average Shortest Path ( $\Delta L$ ); (WT– Mutant); Significant Residues |   |                                                                                                                                                                                                                     |                                                                                                                                                                                                                                               |                                                                                                                                                                                                                                       |
|--------------------------------------------------------------------------|---|---------------------------------------------------------------------------------------------------------------------------------------------------------------------------------------------------------------------|-----------------------------------------------------------------------------------------------------------------------------------------------------------------------------------------------------------------------------------------------|---------------------------------------------------------------------------------------------------------------------------------------------------------------------------------------------------------------------------------------|
| Mutant systems                                                           |   | RUN_1:                                                                                                                                                                                                              | RUN_2                                                                                                                                                                                                                                         | RUN_3                                                                                                                                                                                                                                 |
| Y268C                                                                    | + | <b>PfCytb Chain:</b> Gly_158, Tyr_159, Thr_160, Ser_216, Asp_218, Cys_334, Ala_374, Asn_375<br><b>ISP Chain:</b> Cys_214#, Phe_220, Glu_262, Asp_263, Arg_266, Ala_267, Lys_268, Asp_270                            | <b>PfCytb Chain:</b> Thr_197, Tyr_202, Arg_364, Arg_365, Tyr_368, Asp_369, Tyr_370, Ser_371, Ser_372, Gln_373, Ala_374, Asn_375<br><b>ISP Chain:</b> Cys_214#, Val_217, His_218, Phe_219                                                      | <b>PfCytb Chain:</b> Asn_15, Tyr_16, Pro_17, Pro_209, Phe_210, Tyr_211, Pro_212, Leu_215, Pro_337, Gln_338, Ile_340,<br><b>ISP Chain:</b> Cys_214#, Lys_215, Ser_216, Phe_219, Gln_275, Gly_309, Gly_310, Asn_311                     |
|                                                                          | - | <b>PfCytb Chain:</b> Asn_15, Tyr_16, Pro_17, Ser_70, Pro_199, Leu_200, Tyr_202, Asp_203, Thr_204, Ala_205, Pro_209, Pro_212, Pro_239#, Leu_240#, Val_259, Gln_297, Arg_298, Leu_300<br><b>ISP Chain:</b> Leu_273    | <b>PfCytb Chain:</b> Asn_15, Leu_25, Thr_204, <b>Ile_238*</b> , <b>Pro_239#</b> , <b>Leu_240#</b> , Ser_241, His_242, Pro_243, Asp_244, Asn_245<br><b>ISP Chain:</b> Ser_223, Lys_224, Asp_225, Val_227, Lys_272                              | <b>PfCytb Chain:</b> Pro_149, Val_150, Ile_155, Ser_196, Pro_199, Gly_236, Ile_237, <b>Ile_238*</b> , <b>Pro_239#</b> , <b>Leu_240#</b> , Ser_241, His_242, Pro_243, Met_308, Ile_309, Phe_310,<br><b>ISP Chain:</b> Trp_221, Ile_222 |
| Y268N                                                                    | + | <b>PfCytb Chain:</b> Pro_199, Ser_216, Asp_218, Phe_235, Gly_236, Ile_237, Ile_238, Ser_241, His_242, Pro_243, Asn_245, Cys_334<br><b>ISP Chain:</b> Cys_214*, Lys_215*, His_218, <b>Phe_219*</b>                   | <b>PfCytb Chain:</b> Ile_303, Leu_360, Arg_364, Arg_365, Thr_366, Tyr_368, Asp_369, Tyr_370, Ser_372, Gln_373, Ala_374, Asn_375<br><b>ISP Chain:</b> Ser_216, Val_217, <b>Phe_219*</b> , Phe_220, Glu_262, Asp_263, Gln_265, Arg_266, Glu_269 | <b>PfCytb Chain:</b> Ser_147, Ile_304, Pro_337, Gln_338<br><b>ISP Chain:</b> Cys_214*, Lys_215*, Ser_216, Gly_309, Gly_310, Asn_311, Pro_336                                                                                          |
|                                                                          | - | <b>PfCytb Chain:</b> Asn_15, Tyr_16, Pro_105, Ser_147, Pro_149, Val_161, Pro_209, Pro_212, Ser_299, Pro_337, Tyr_368, Asp_369<br><b>ISP Chain:</b> Ser_223*, Asp_225, Leu_226*, Val_227*                            | <b>PfCytb Chain:</b> Asn_21, Asn_23, Pro_199<br><b>ISP Chain:</b> Ser_223*, Lys_224, Leu_226*, Val_227*, Lys_272, Leu_273, Thr_276, Asn_311                                                                                                   | <b>PfCytb Chain:</b> Tyr_28, Gly_229, Gly_230, Gly_251, Ala_267, Lys_268, Glu_269, Asp_270, Asp_271, Lys_272, Leu_273, Ile_274                                                                                                        |
| Y268S                                                                    | + | <b>PfCytb Chain:</b> Asn_21, Ser_216, Asp_218, Cys_334<br><b>ISP Chain:</b> Cys_214, Lys_215, Ser_216, His_218, <b>Phe_219*</b> , Arg_266, Ala_267, Lys_268                                                         | <b>PfCytb Chain:</b> Ser_147, Asn_213, Leu_214, Ile_304, Arg_364, Arg_365, Tyr_368, Asp_369, Tyr_370, Ser_371, Ser_372, Gln_373, Ala_374, Asn_375,<br><b>ISP Chain:</b> Glu_262, Asp_263, Gln_265, Arg_266, Ala_267, Lys_268                  | <b>PfCytb Chain:</b> Thr_142, Ile_148, Phe_210, Leu_215, Arg_298, Pro_337, Gln_338<br><b>ISP Chain:</b> Phe_219*, Gln_275, Thr_276, Met_277, Arg_278, Gly_310, Asn_311, Pro_336                                                       |
|                                                                          | - | <b>PfCytb Chain:</b> Asp_203, Thr_204, Ala_205, Pro_209, Pro_239, Glu_296, Gln_297, Ser_299, Leu_300, Thr_301, Thr_302, Ile_303, Val_361, Arg_365, Tyr_370, Ser_371, Ser_372, Asn_375<br><b>ISP Chain:</b> Leu_226* | <b>PfCytb Chain:</b> Asn_15, Asn_23, Leu_25, Ala_205, Ala_328<br><b>ISP Chain:</b> Lys_215, Ser_223, Asp_270*, Asp_271, Lys_272, Leu_273, Thr_276                                                                                             | <b>PfCytb Chain:</b> Asp_203, Leu_228, Phe_235, Gly_236, Ile_237, Ile_238, Ser_241, His_242, Pro_243, Asp_244, Asn_245, Gln_257, Ala_312, Arg_313, Cys_334, Asn_375<br><b>ISP Chain:</b> Asp_225, Leu_226, Asp_270                    |

**Table S11.** Molecular composition of the simulation systems

| System    | Bilayer   | Lipids | Water | Counter Ions<br>(added after tleap) |     |
|-----------|-----------|--------|-------|-------------------------------------|-----|
|           |           |        |       | Na+                                 | Cl- |
| Wild-type | POPC:POPE | 990    | 29497 | 3                                   | 4   |
| Y268C     | POPC:POPE | 984    | 29574 | 3                                   | 4   |
| Y268N     | POPC:POPE | 987    | 29710 | 2                                   | 3   |
| Y268S     | POPC:POPE | 981    | 29504 | 2                                   | 3   |

**Table S12.** Computational research tools used in the study and brief descriptions of their functionalities.

| <b>Program</b>                  | <b>Functionality/Description</b>                                                                                                                                                                                                                                                                                                       |
|---------------------------------|----------------------------------------------------------------------------------------------------------------------------------------------------------------------------------------------------------------------------------------------------------------------------------------------------------------------------------------|
| AmberTools [1]                  | A suite of MD tools and associated programs that allow users to carry out molecular dynamics simulations on biomolecules.                                                                                                                                                                                                              |
| CPPTRAJ [2]                     | A program designed for processing and analysing MD simulation trajectories including RMSD, Rg, RMSF as well as hydrogen bond analysis. It can also perform clustering analysis between trajectories or between frames of the same trajectory. It is a part of AmberTools.                                                              |
| Discovery Studio Visualizer [3] | 3D molecular graphics visualization tool used to view and analyze macromolecular structures.                                                                                                                                                                                                                                           |
| Gaussian09 [4]                  | Computational chemistry software package. It employs laws of quantum mechanics to perform a multitude of calculations to predict energies, molecular structures, and spectroscopic data.                                                                                                                                               |
| GaussView [5]                   | GaussView is a graphical interface for Gaussian, it mainly assists with pre-and post-processing of jobs from Gaussian.                                                                                                                                                                                                                 |
| GROMACS [6]                     | Tool for molecular dynamics simulations of macromolecular structures. The software package also contains functionality for trajectory analysis .                                                                                                                                                                                       |
| H++ server [7]                  | Open source web-server used for the protonation of a protein structure. It first computes the pK values of ionizable groups in the protein, then adds missing protons according to the pH of the environment. It outputs parameters and coordinate files for simulations, currently in AMBER format.                                   |
| I-TASSER [8–10]                 | Template-based prediction tool for protein structures and function. Structure prediction proceeds by threading with the use of one main template along with other templates. The Local Meta-Threading Server,(LOMETS) is utilized for threading and the BioLIP protein function database is used to predict the function of the model. |
| Maestro [11]                    | Molecular modeling software. It is also a molecular graphics visualization tool used to view and analyze macromolecular structures.                                                                                                                                                                                                    |
| MD-TASK [12]                    | A suite of Python scripts that It employs graph theory techniques, perturbation response scanning, and dynamic cross-correlation for analyzing MD trajectories.                                                                                                                                                                        |
| MCPB.py [13]                    | Python-based metal center parameter builder for the modeling of metal centers and simulation of metal complexes. It involves a semi-automated workflow of parameterization schemes to drive both force constants of metals and charged parameters.                                                                                     |
| Packmol-memgen [14]             | Generalized workflow for automated building of membrane-protein-lipid-bilayer systems.                                                                                                                                                                                                                                                 |
| PROCHECK [15]                   | A suite of programs used to assess the stereochemical quality of proteins. It produces a number of Pos-script plots showing the overall analysis of the protein and residues by residue geometry, it further highlights regions that may need investigation.                                                                           |
| PyMOL [16]                      | 3D molecular graphics visualization tools used to view and analyze macromolecular structures.                                                                                                                                                                                                                                          |
| RAMPAGE [17]                    | A Web server used for the validation of 3D structure modeled.                                                                                                                                                                                                                                                                          |
| VMD [18]                        | Molecular modeling and visualization computer program.                                                                                                                                                                                                                                                                                 |

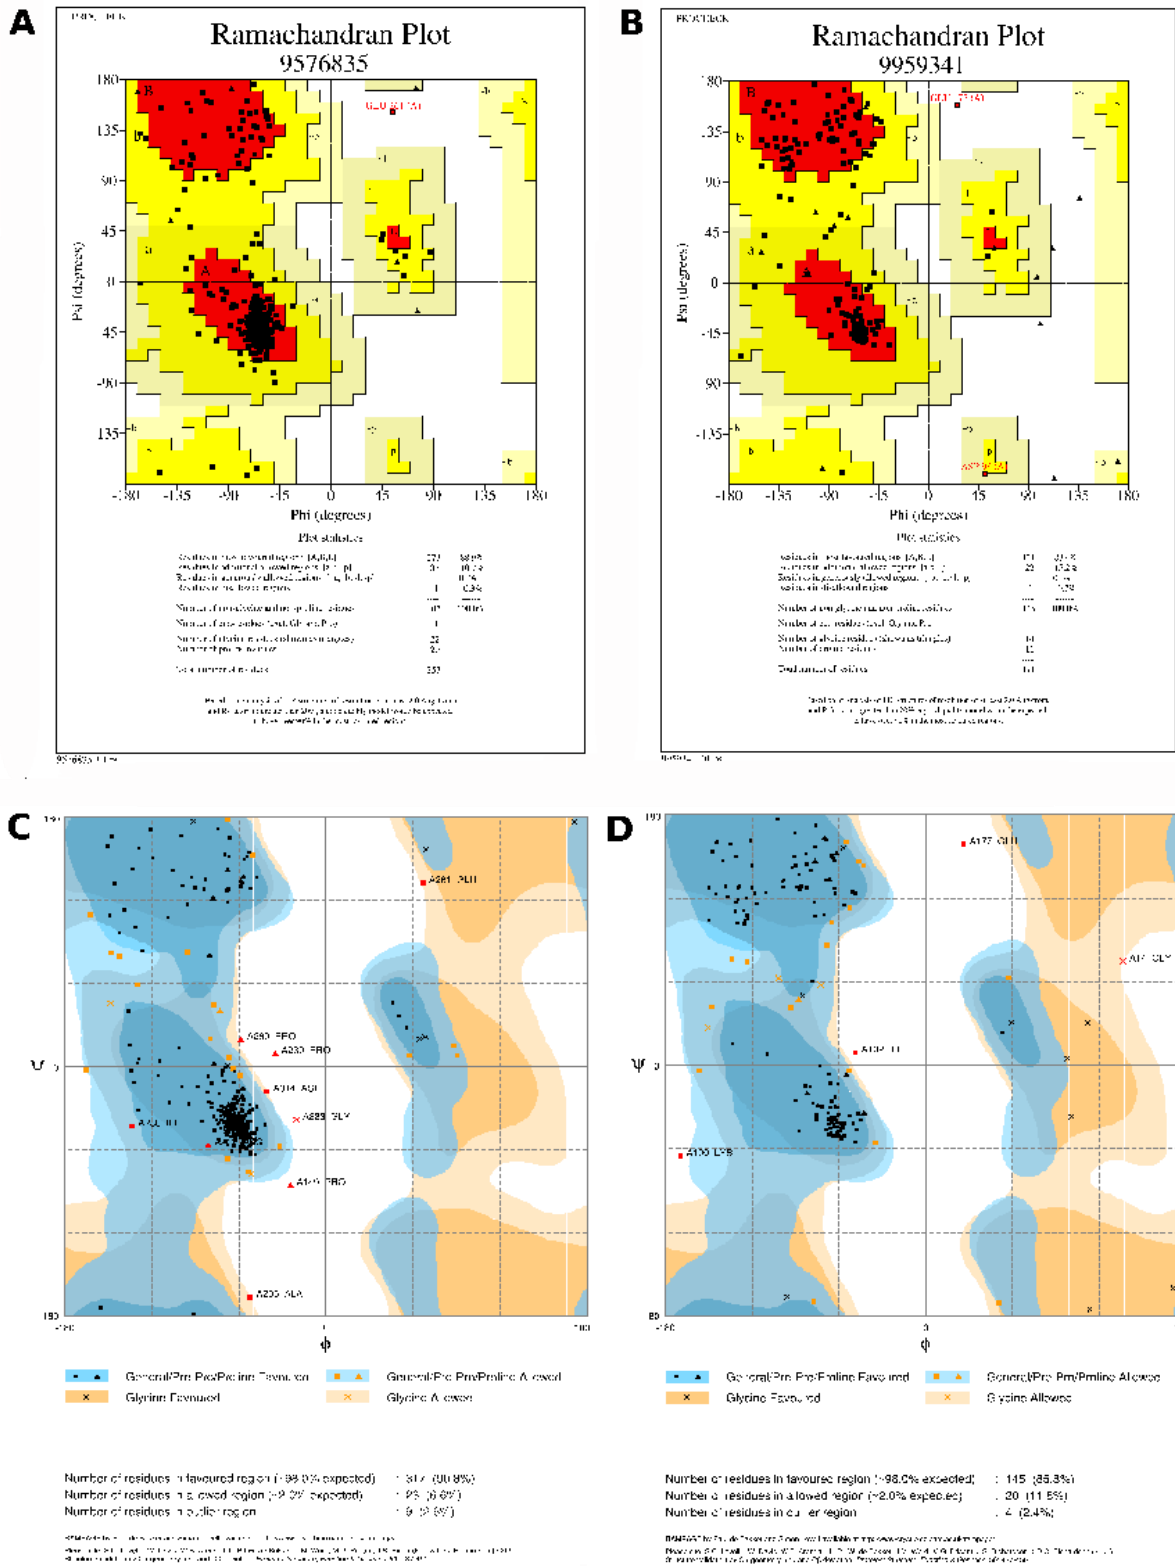

**Figure S1. Predicted protein model validation in form of Ramachandran plots. (A) and (B) representing PfCytb and ISP respectively using PROCHECK as well as (C) and (D) representing PfCytb and ISP respectively using RAMPAGE. Most of the residues are observed to be in the most favored and allowed regions. Overall, the model quality was good.**

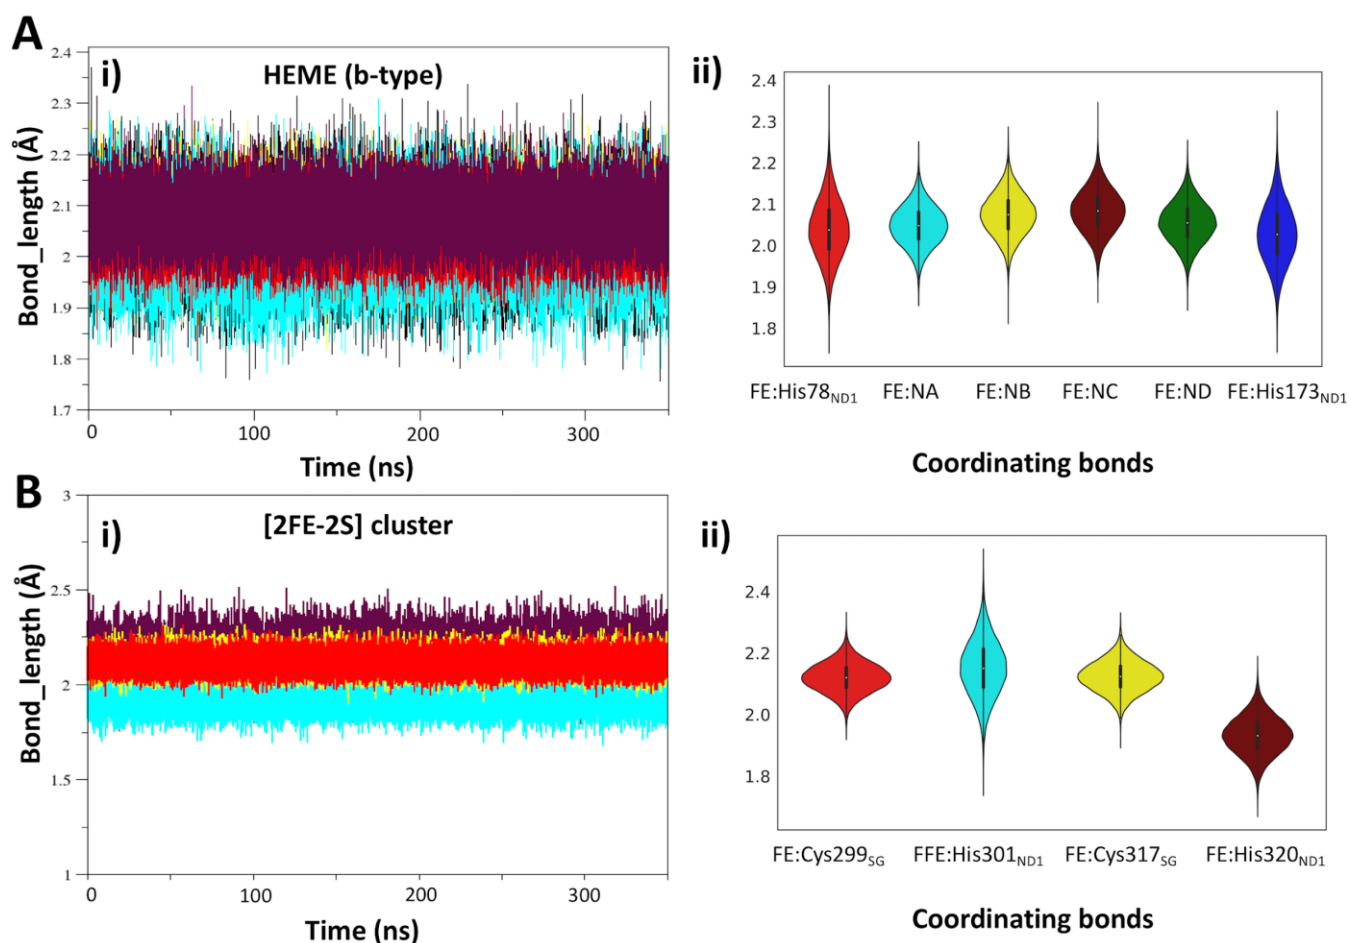

**Figure S2. Calculated bond distances monitored during 350 ns MD simulations.** (A) and (B) represents i) Heme and ii) [2FE-2S] cofactors, respectively. Metal ion FE stands for FE<sub>1</sub> for the heme and two iron metals (FE<sub>2</sub> and FE<sub>3</sub>) for the 2FE-2S] cluster. The various bond distances are also represented as violin plots for distinction of some of the overlapping bonds present in the line graph. Fe<sup>2+</sup> bonds to His78, His173, NA, NB, NC, and ND are shown in red, blue, cyan, yellow, maroon and green respectively for Heme cofactor while Fe<sup>2+</sup> bonds to His301, His320, Cys299 and Cys317 are shown in red, cyan, maroon and yellow colors respectively for 2FE-2S] cluster.



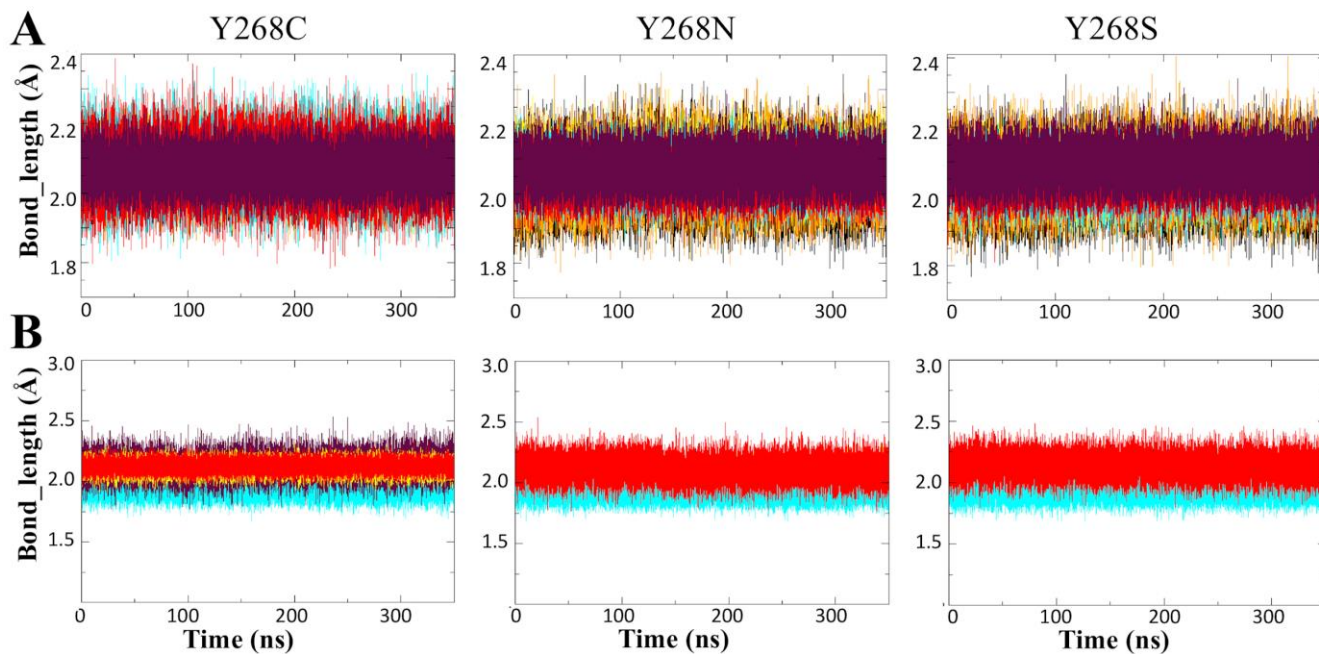

**Figure S3. Calculated bond distances monitored during 350 ns MD simulations in the mutant systems (Y268C, Y268N and Y268S).** Graphs shown in (A) and (B) represents Heme and [2FE-2S] cluster cofactors, respectively. Fe<sup>2+</sup> bonds to His78, His173, NA, NB, NC, and ND are shown in red, blue, cyan, yellow, maroon and green respectively for Heme cofactor while Fe<sup>2+</sup> bonds to His301, His320, Cys299 and Cys317 are shown in red, cyan, maroon and yellow colors respectively for 2FE-2S] cluster. Metal parameters were successfully transferred to the systems prior to MD simulation. The bond distances are comparable to the WT system shown in Figure S2.



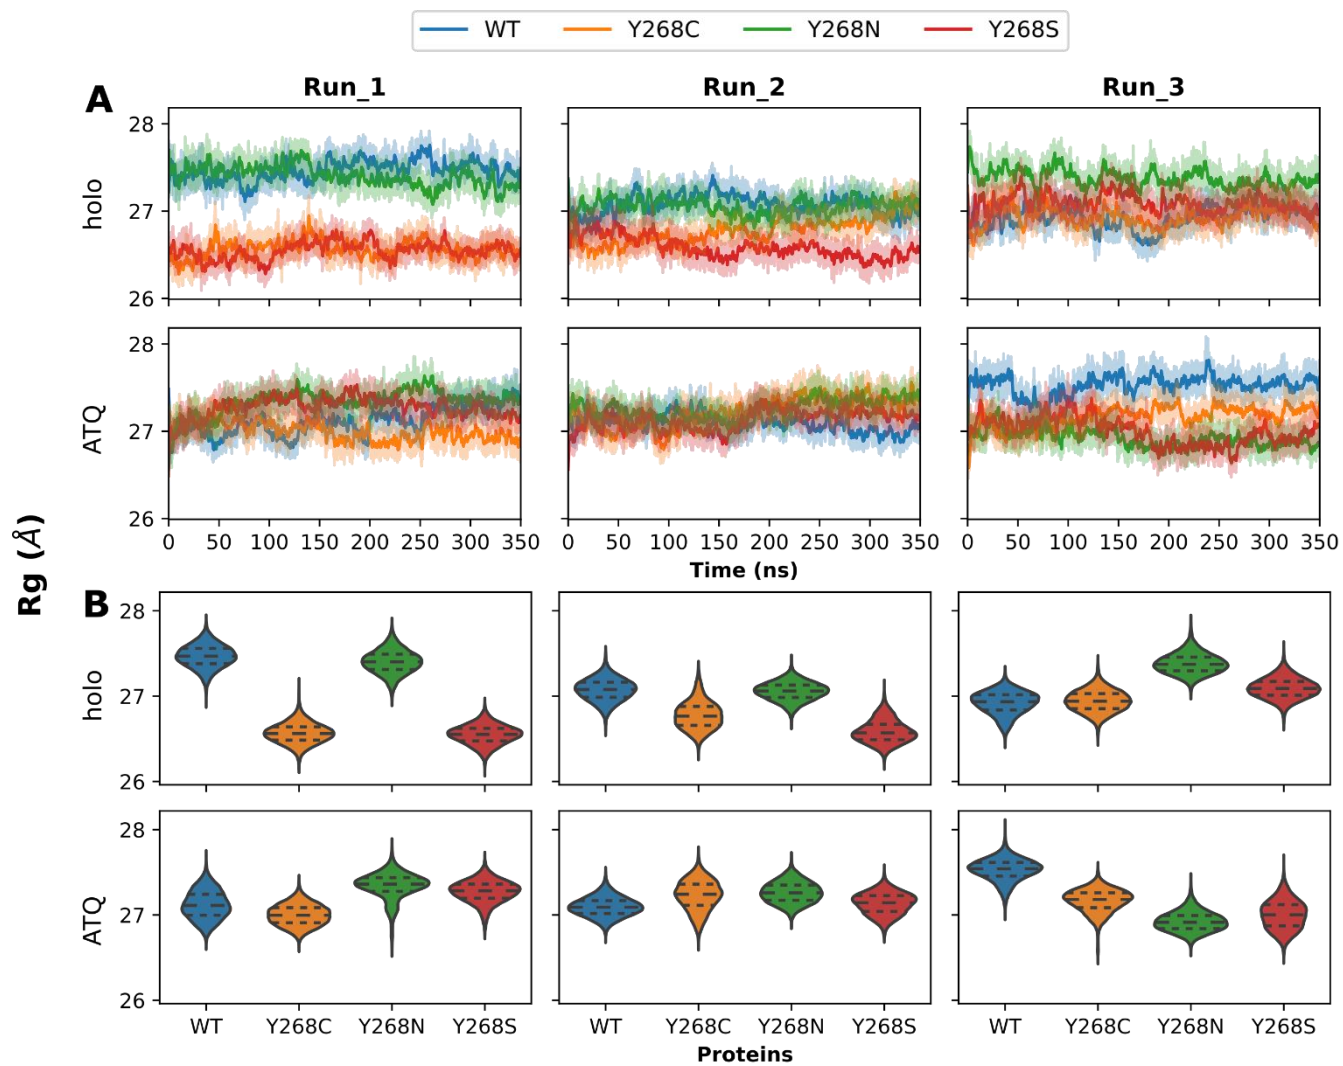

**Figure S4. Rg comparison of WT and mutant both in the presence and absence of ATQ during the 350 ns MD simulation. A Line graph representation. B Violin plot presentation**

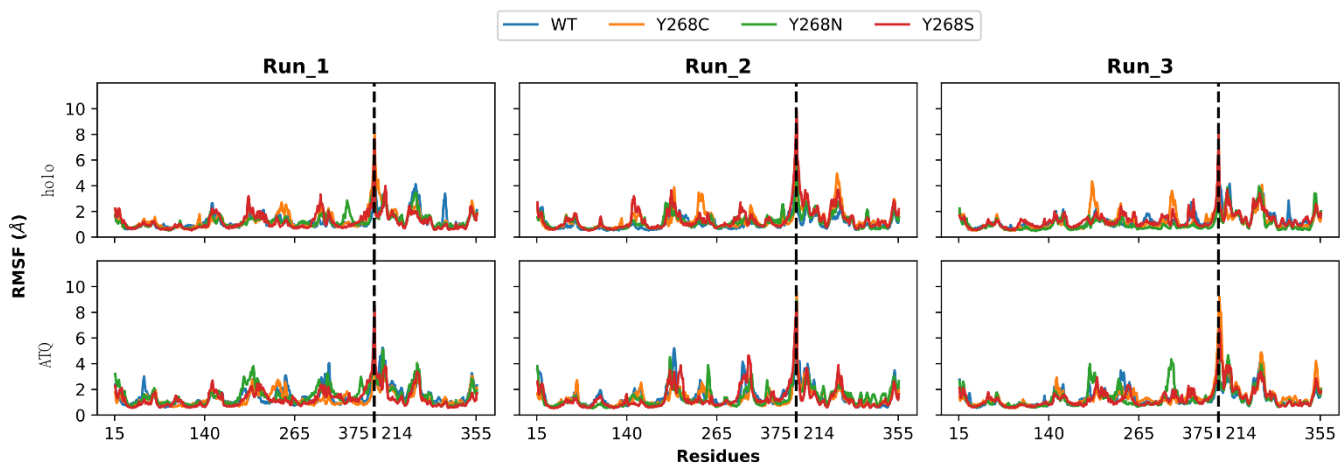

**Figure S5. Line graph comparison of RMSF as observed in the WT and mutant PfCytb-ISP protein systems during 350 ns MD simulation in the presence and absence of ATQ. A total of three replicate runs were calculated and displayed. High values show regions of high flexibility.**

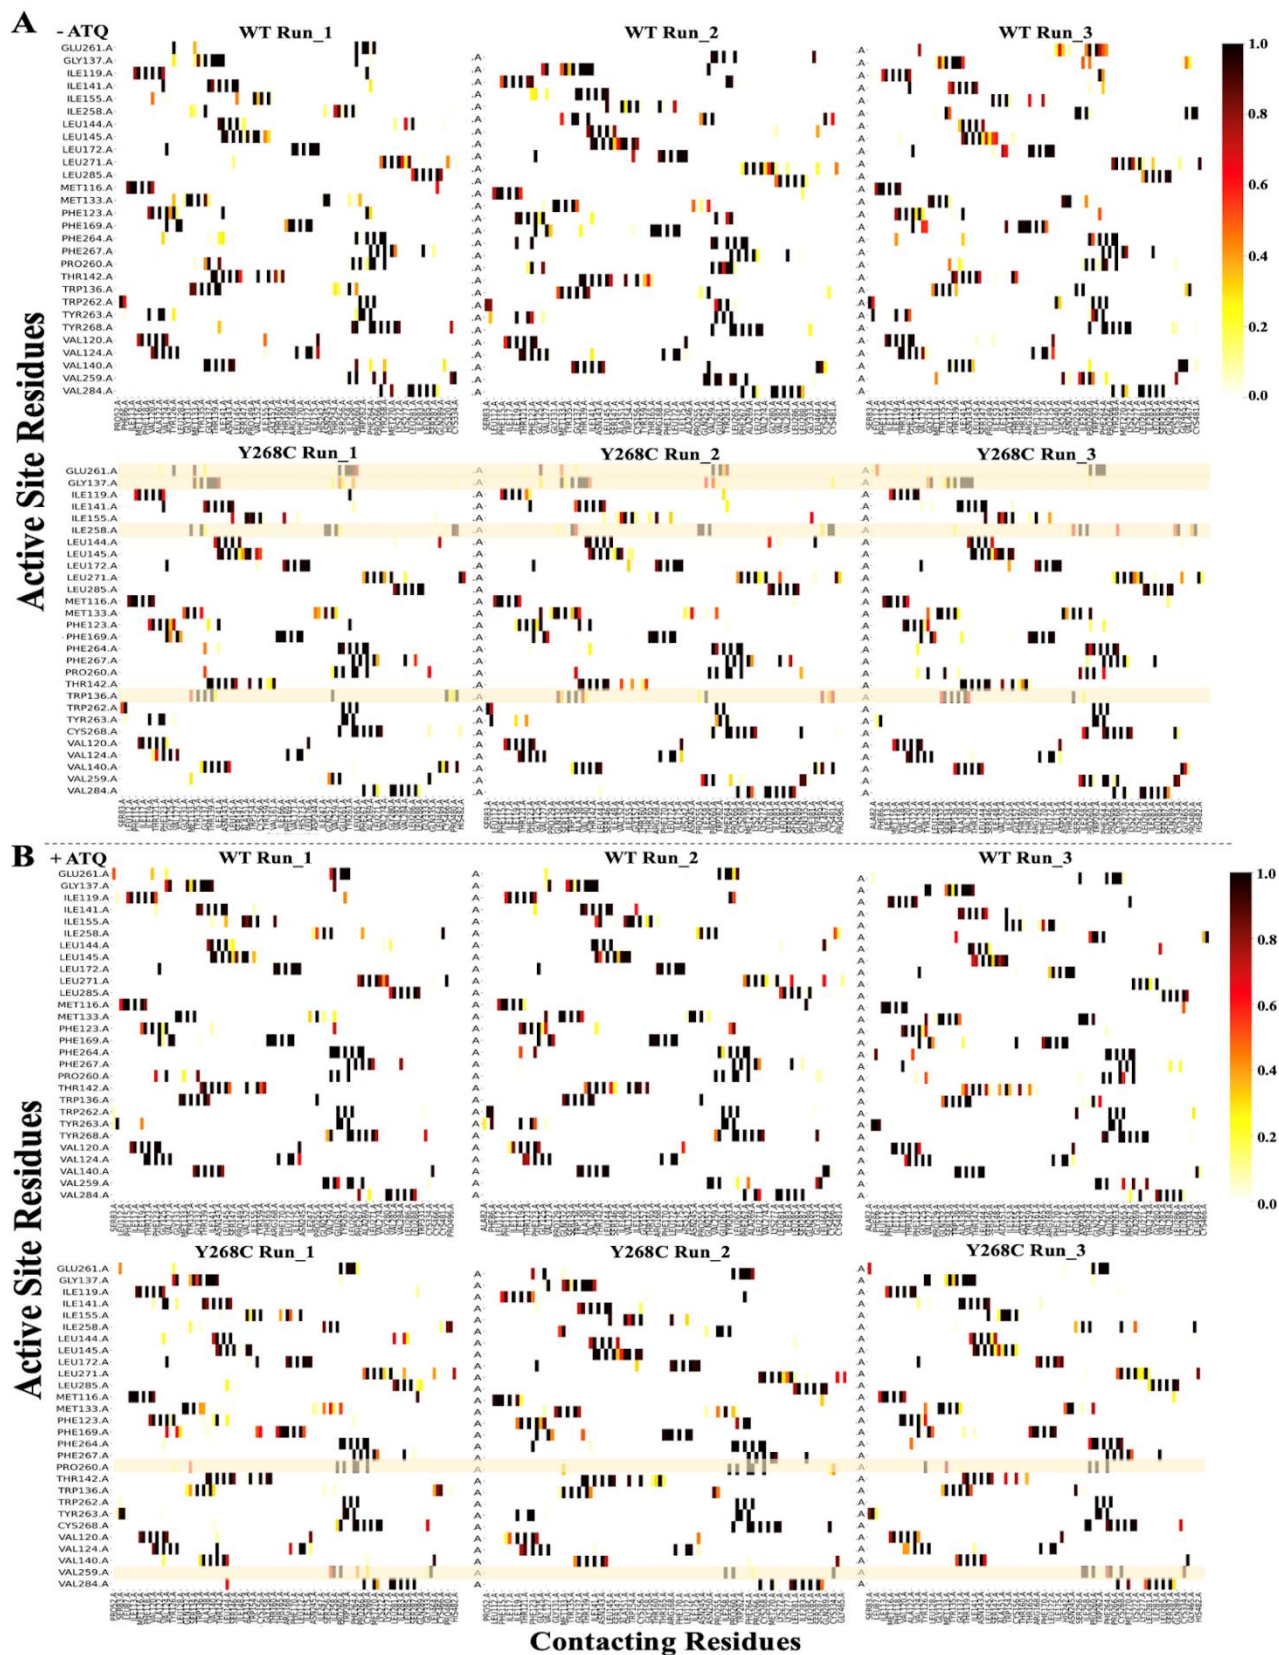

**Figure S6.** Residue contact heatmap between active site residues ( $n = 28$ ) and other residue contacts. Comparison of WT and mutant system Y268C was performed in both Holo and ATQ-bound proteins in their respective triplicate runs in the last 100 ns of MD simulation time. Regions observed to reduce or lose residue contact are shaded in light golden color.



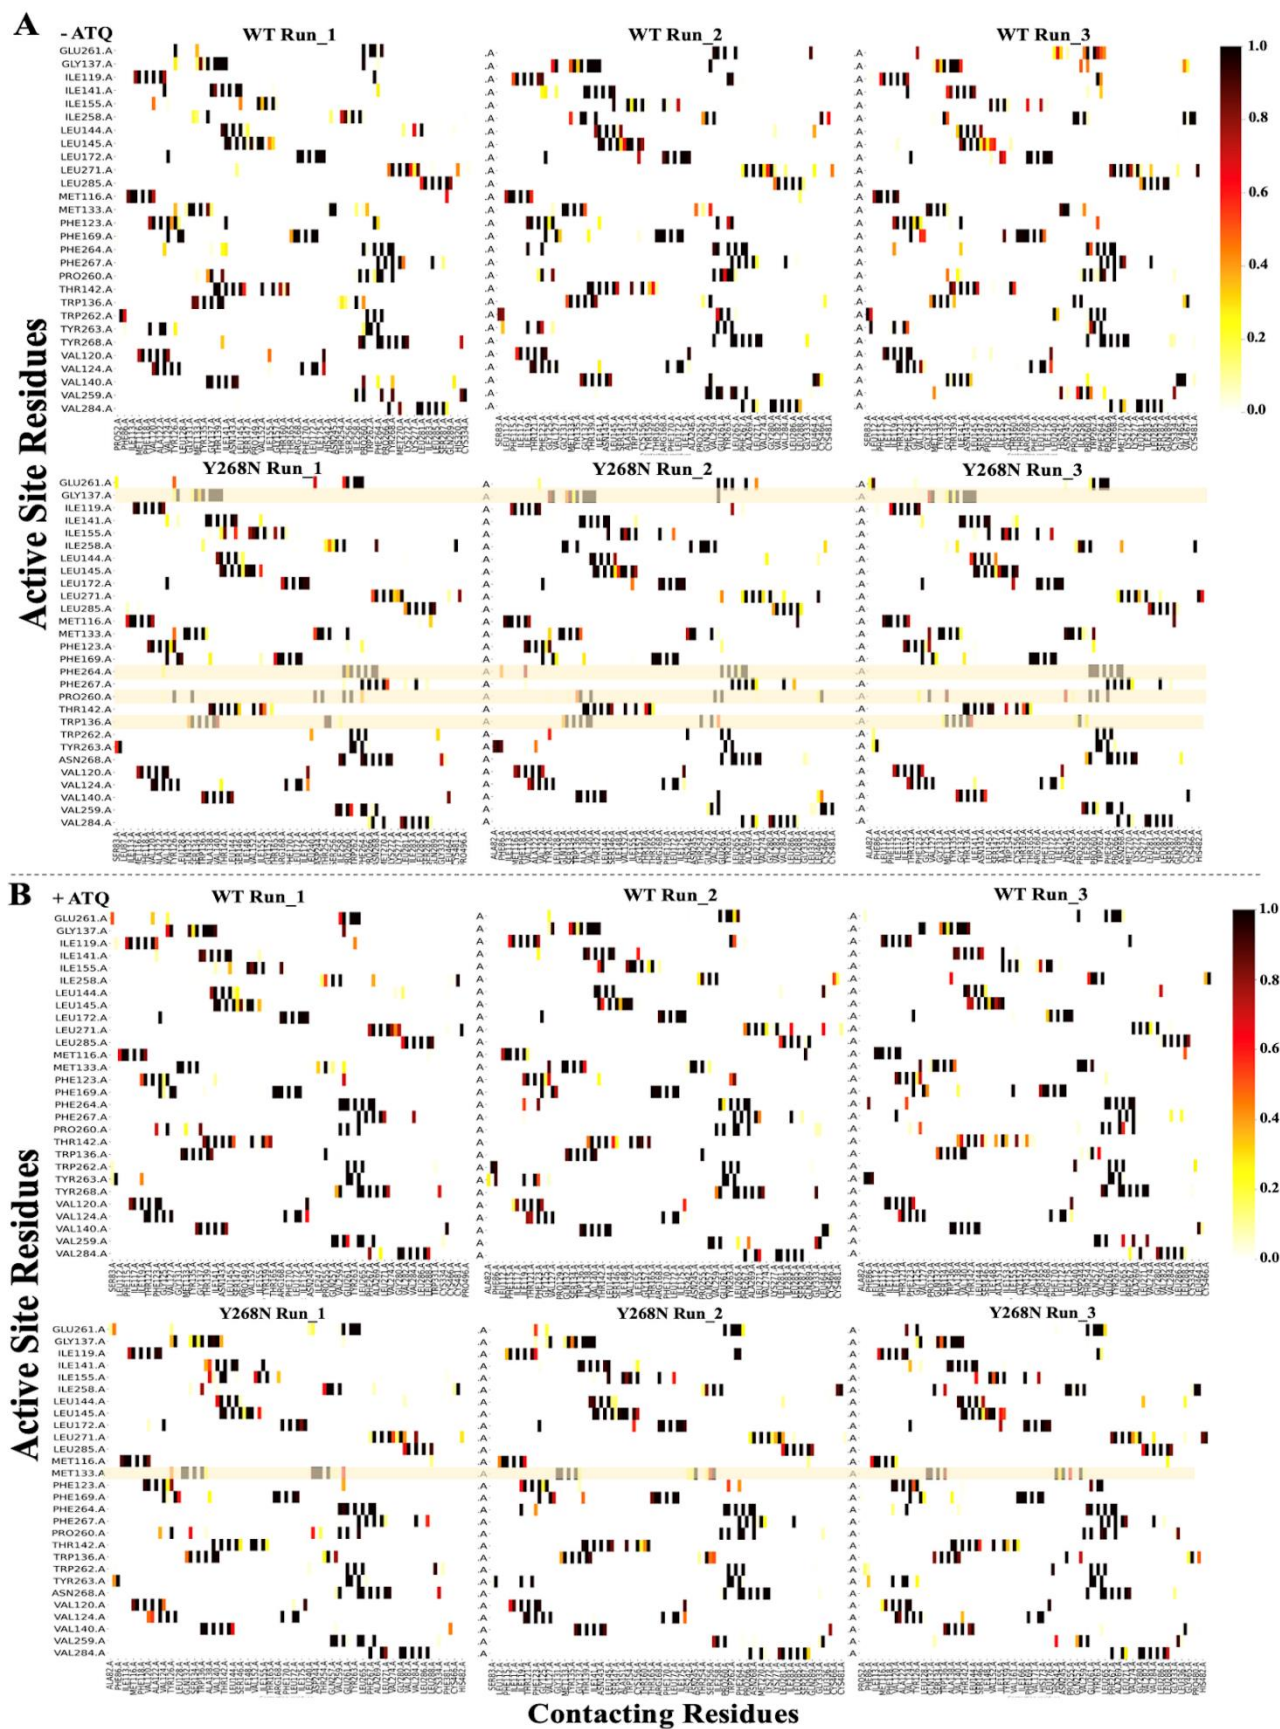

**Figure S7.** Residue contact heatmap between active site residues ( $n = 28$ ) and other residue contacts. Comparison of the WT and mutant system Y268N was performed in both Holo and ATQ-bound proteins in their respective triplicate runs in the last 100 ns of MD simulation time. Regions observed to reduce or lose residue contact are shaded in light golden color.

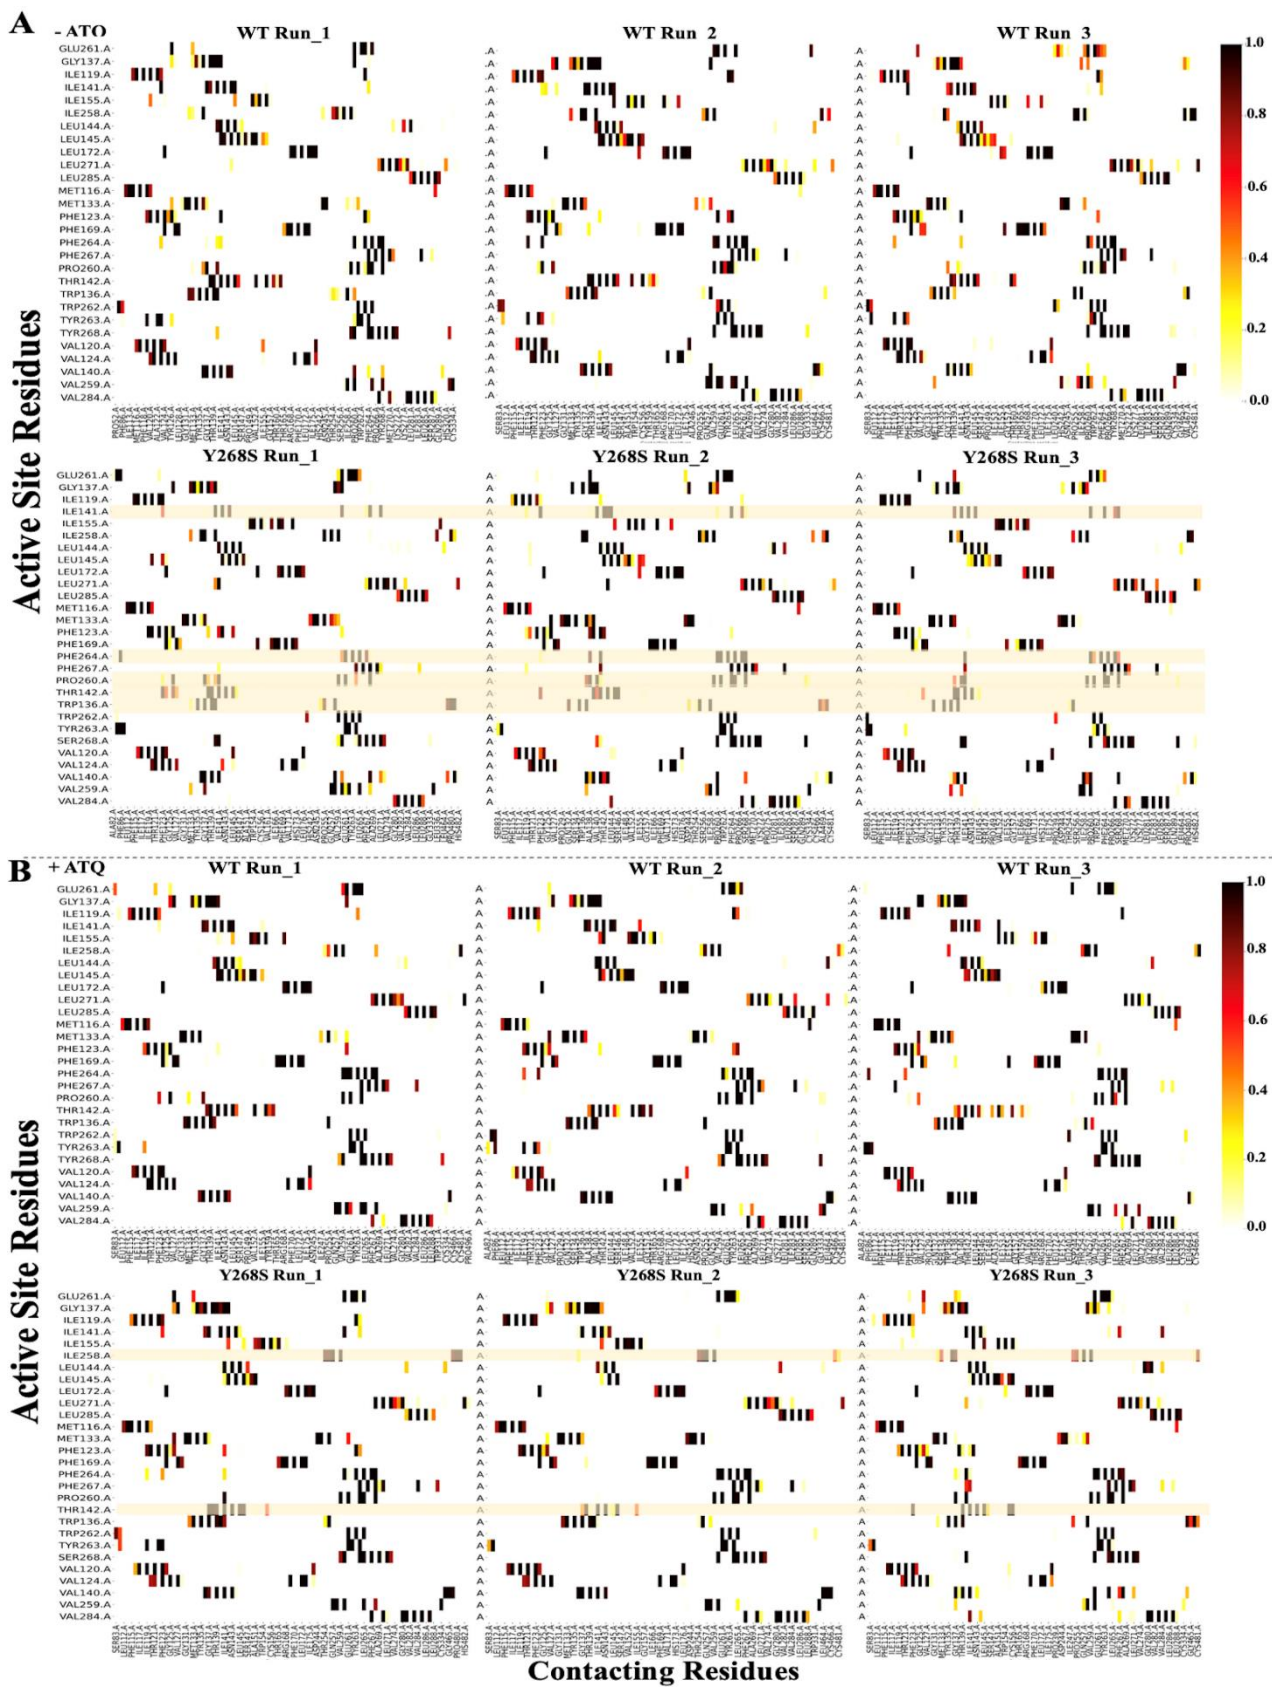

**Figure S8.** Residue contact heatmap between active site residues ( $n = 28$ ) and other residue contacts. Comparison of the WT and mutant system Y268S was performed in both Holo and ATQ-bound proteins in their respective triplicate runs in the last 100 ns of MD simulation time. Regions observed to reduce or lose residue contact are shaded in light golden color.

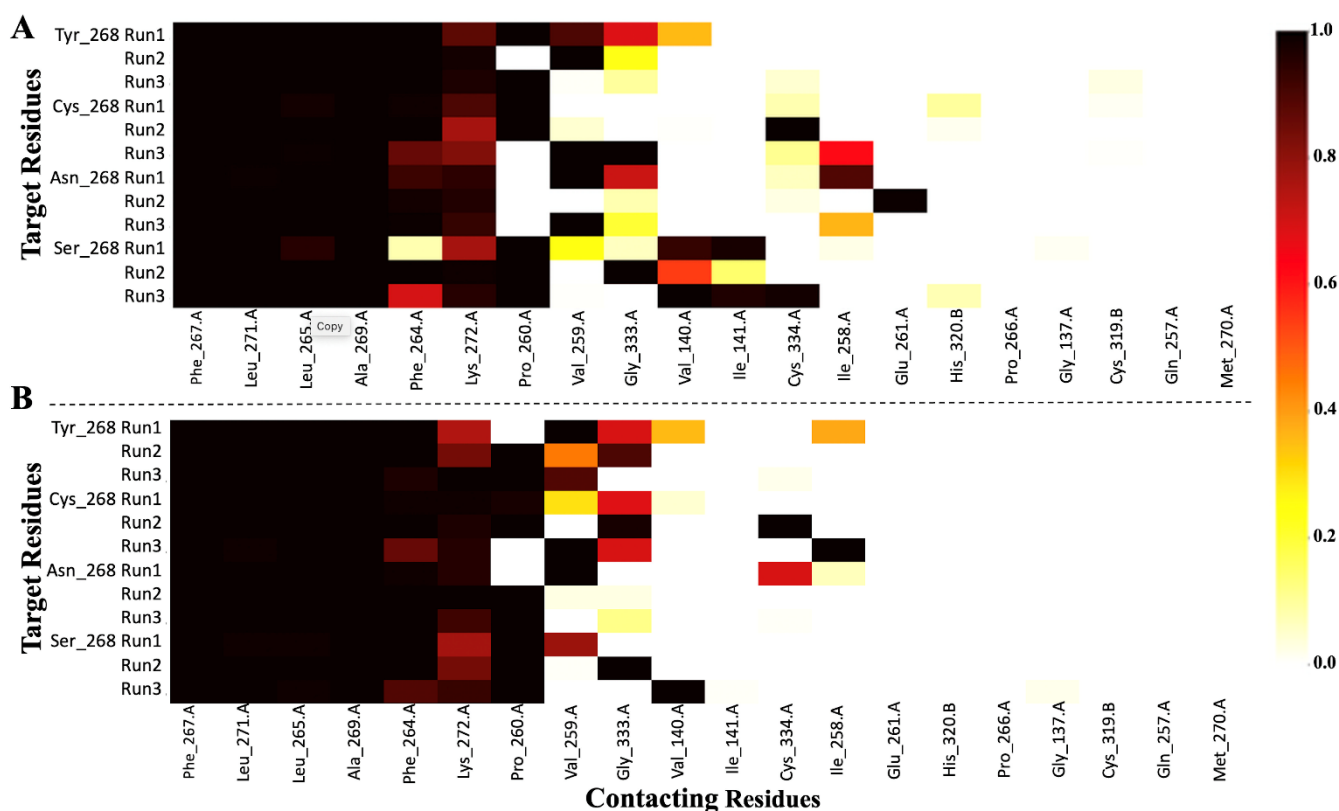

**Figure S9. Residue contact heat map of Y268C, Y268N, Y268S mutant systems with reference to wild type yielded during the last 100 ns of MD simulations for all systems in the triplicate runs. A PfCytb-ISP holo protein B PfCytb-ISP ATQ-bound protein.** Individual residue contact maps for WT and all mutant systems in triplicate runs are displayed in Figure S10. Residues ordered by the proportion of contacts across simulation time. Residue names ending with A or B represent chain A and B, respectively.





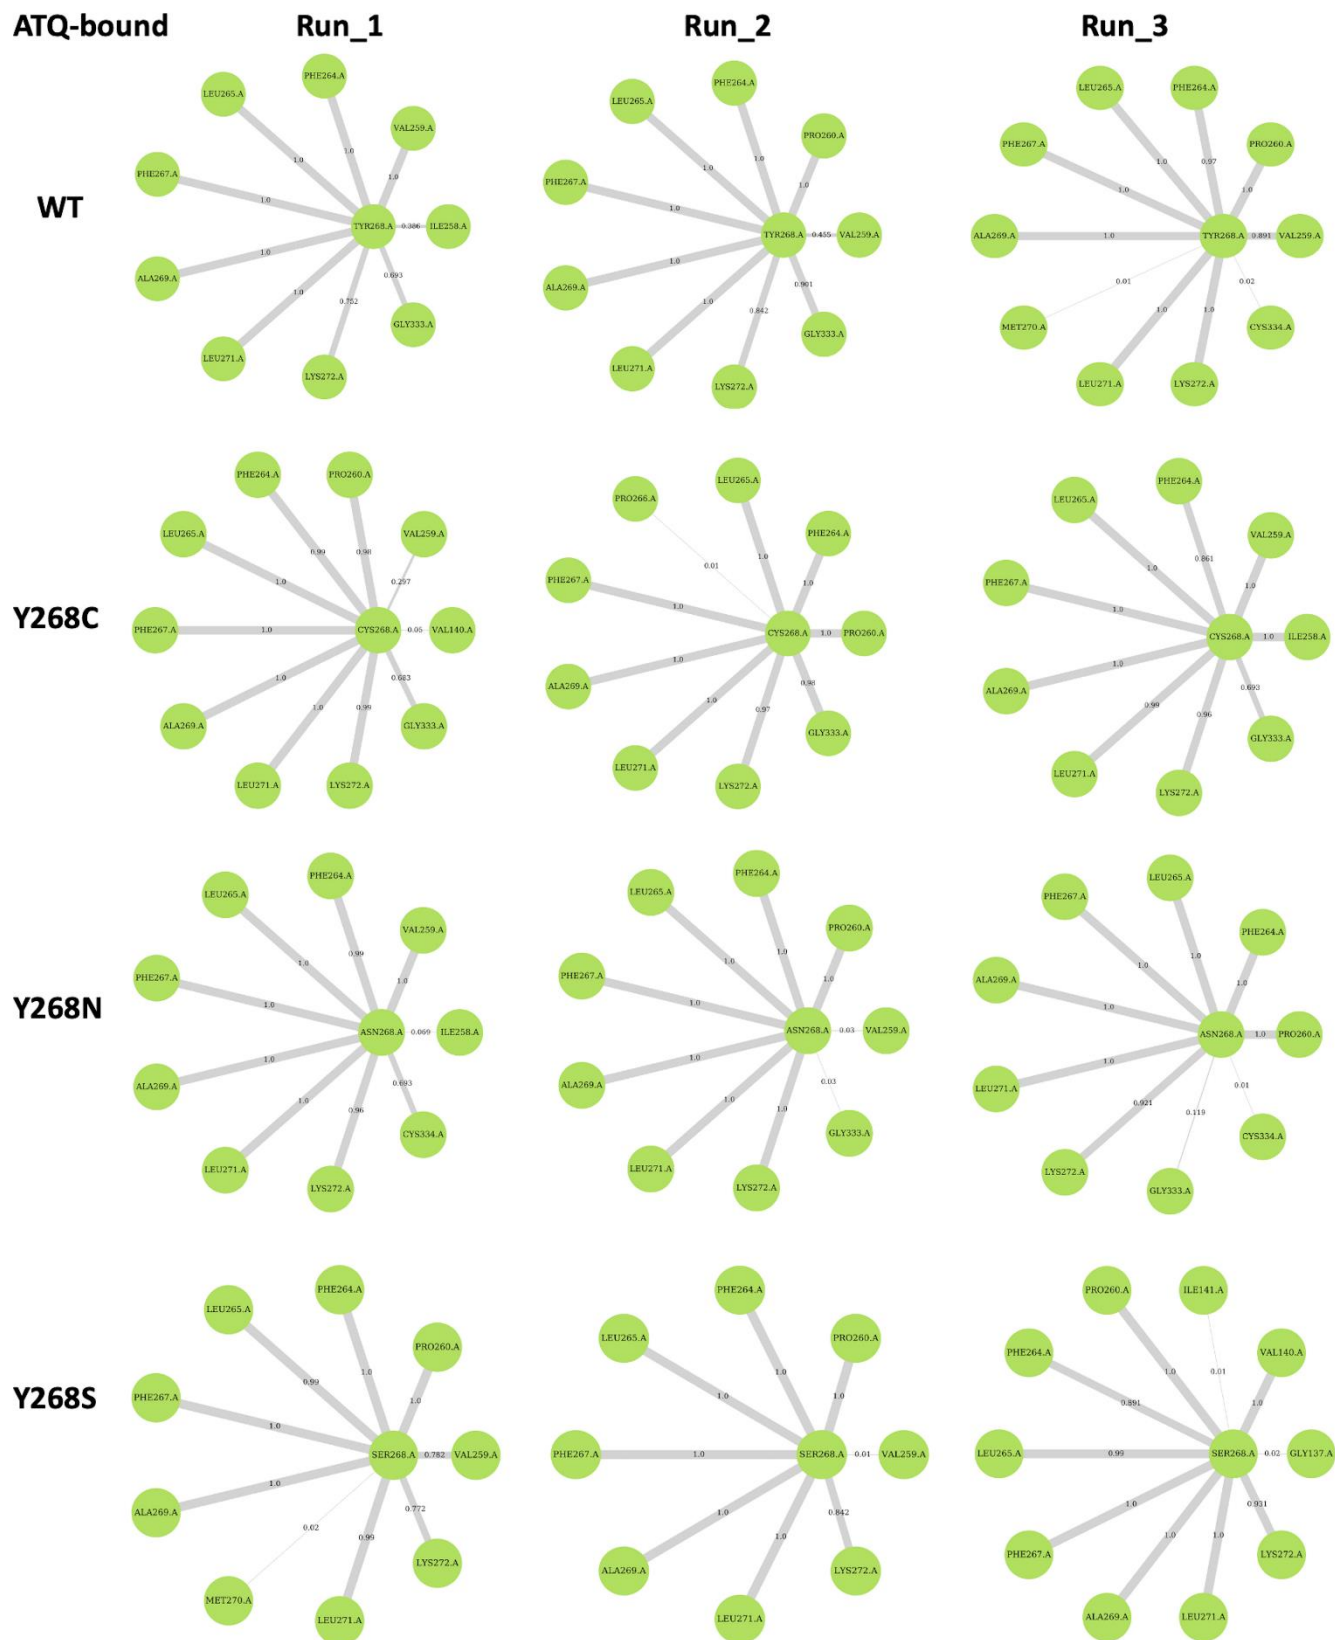

Figure S11. Residue contact map for each of the PfCytb-ISP ATQ-bound protein systems (WT, Y268C, Y268N and Y268S) in their respective triplicate runs in the last 100 ns of MD simulation time. Using WT as the reference, contact residues Gly333, Val259, Pro260 and Phe264 were noted to be compromised (reduced/lost) in the presence of mutation.



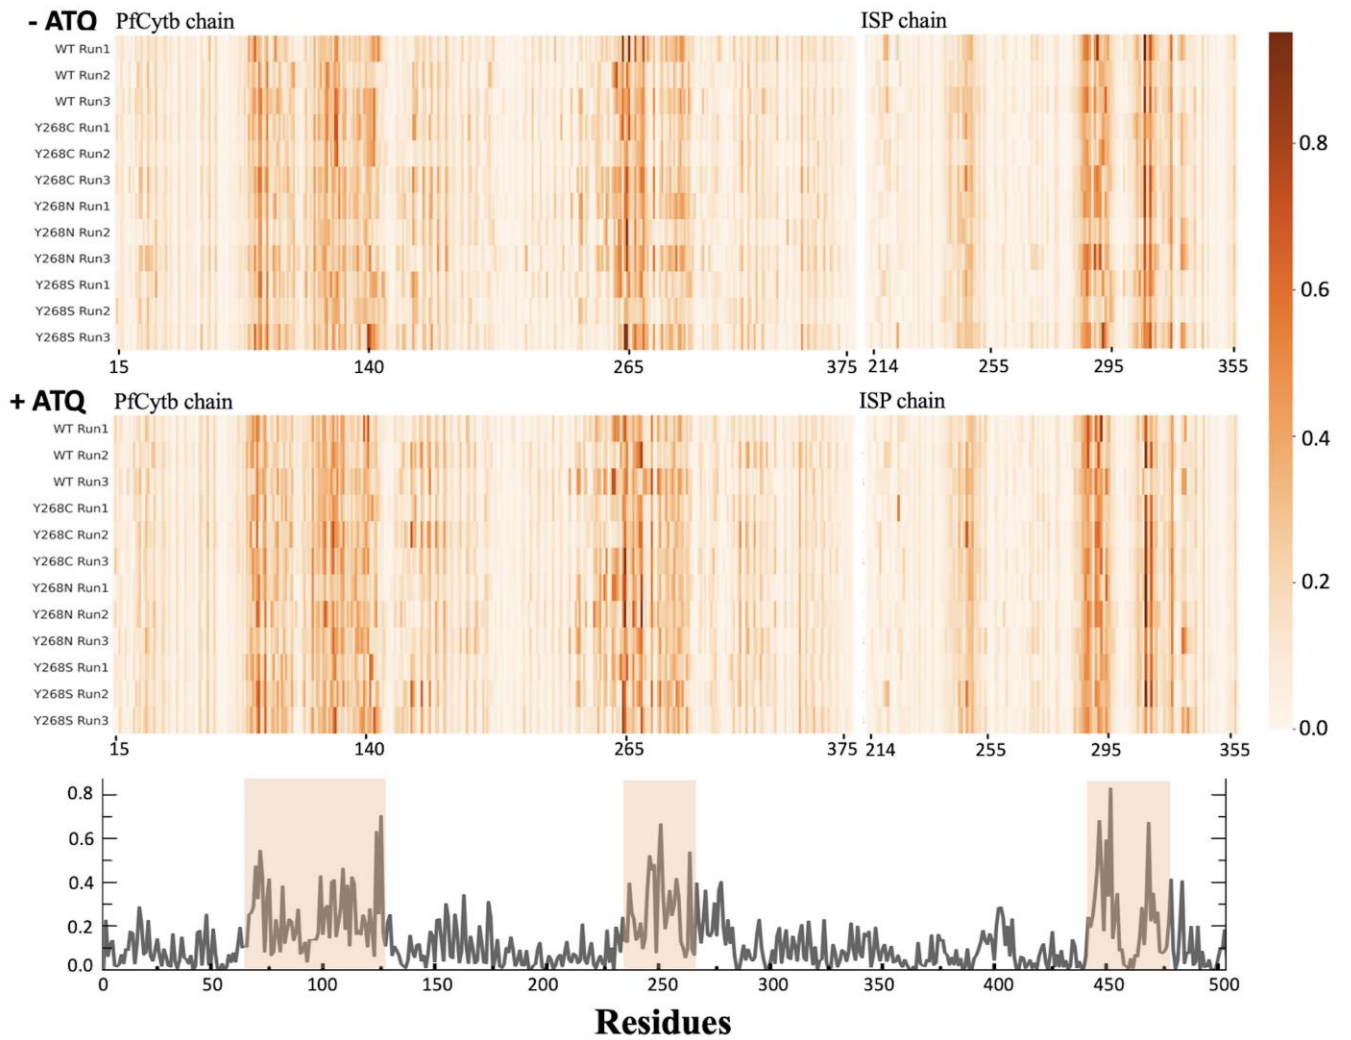

**Figure S12.** Heat map comparison of BC values in PfCytb-ISP holo and ATQ-bound proteins. High BC values indicate regions of high residue connectivity.

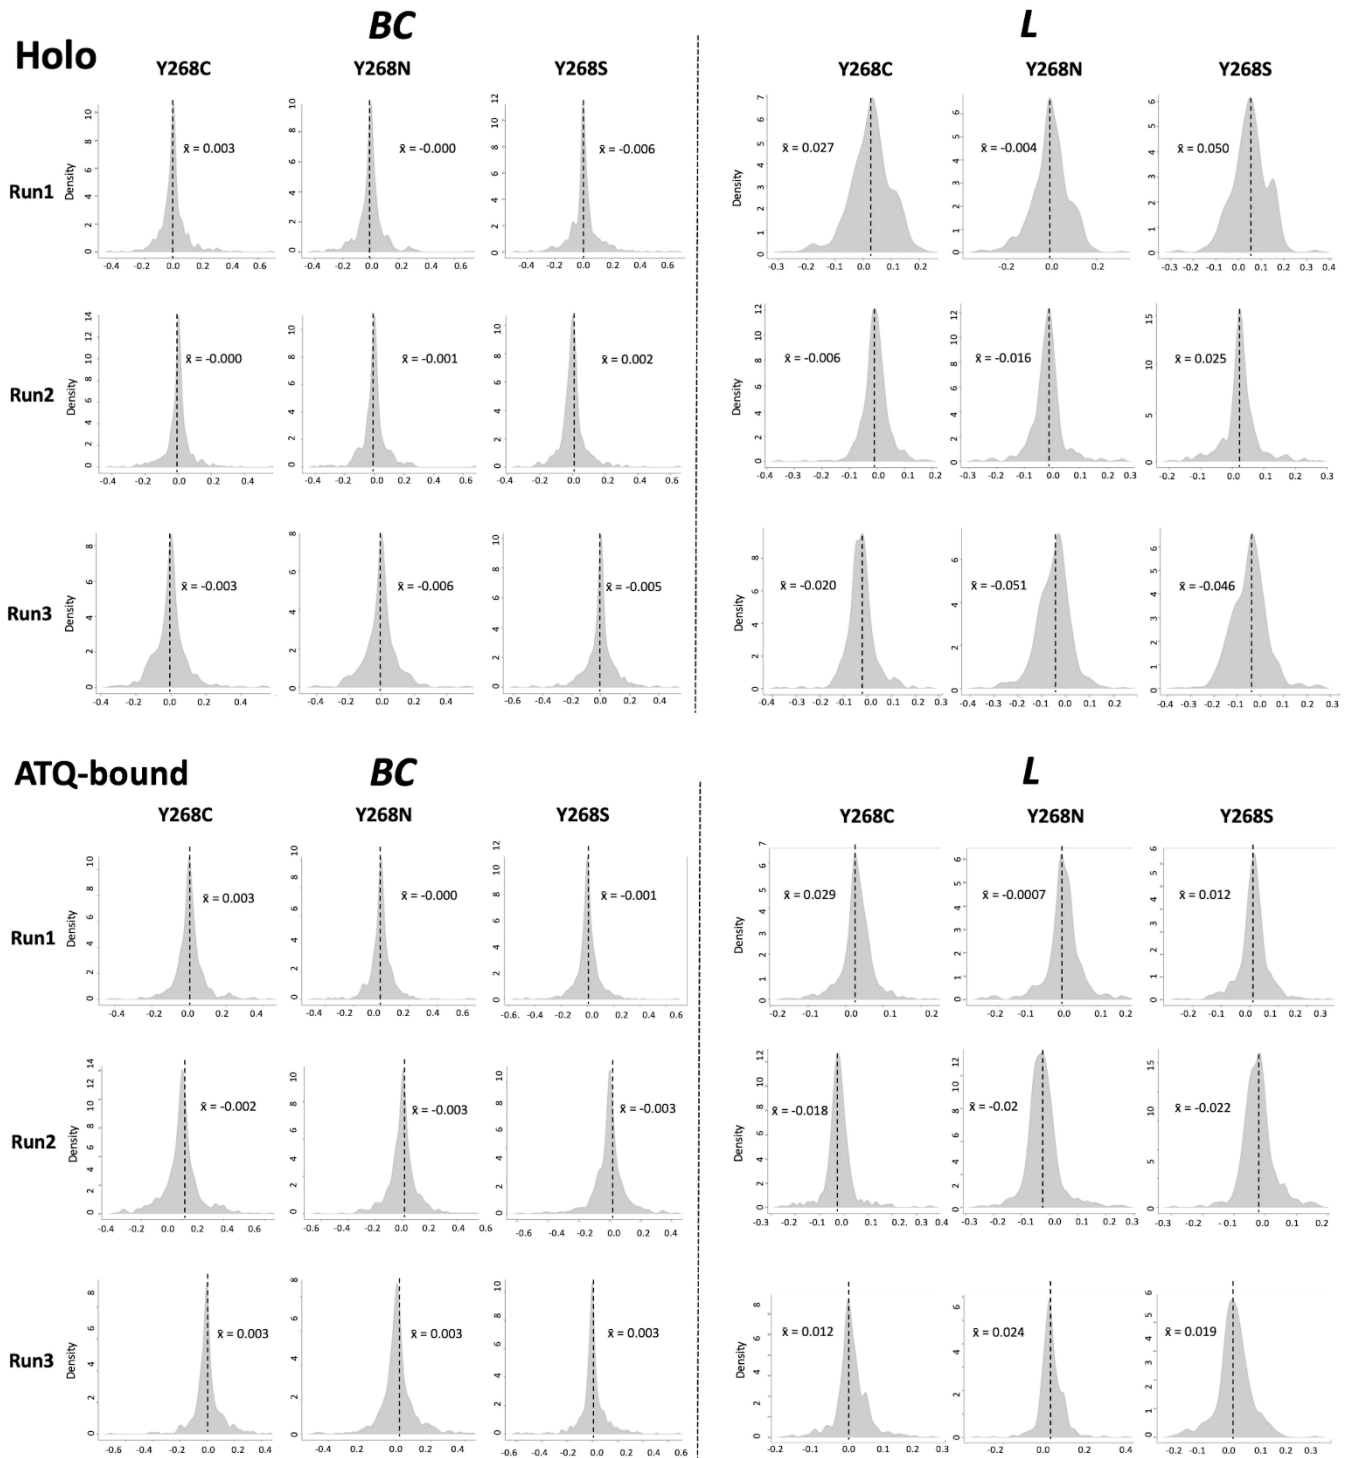

Figure S13. Density plot for delta *BC* and *L* values (N =503) for mutant systems (Y268C, Y268N, and Y268S) in three replicate runs. The plots show that (A) *BC* and (B) *L* data was normally distributed where the mean is displayed by a dotted line.

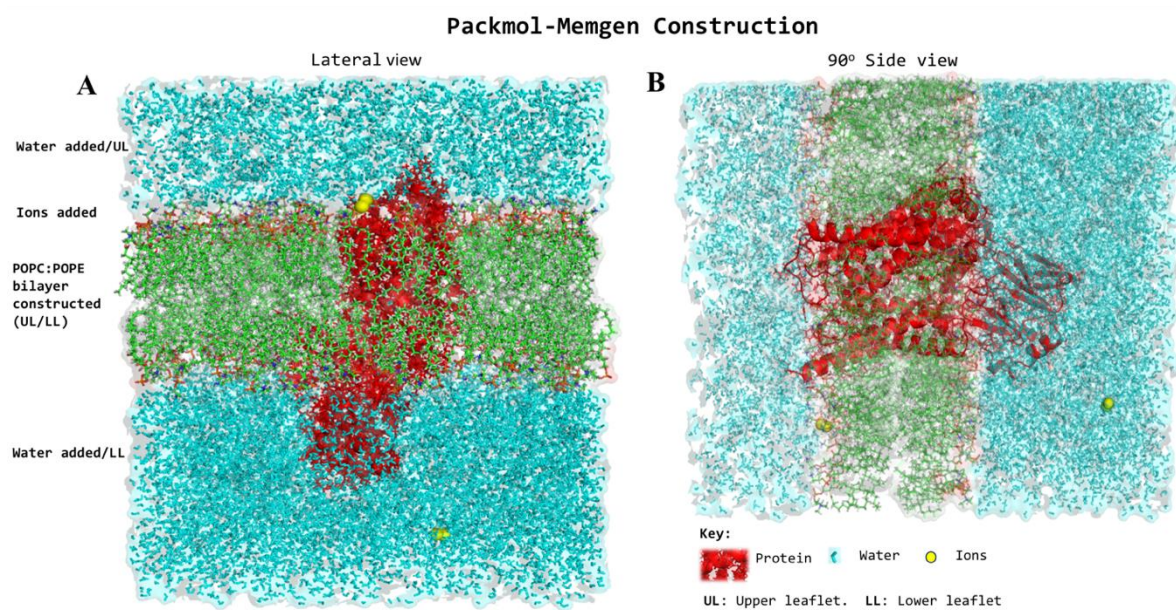

**Figure S14. Structural representation of membrane construction with PfCytb-ISP protein.** The protein embedded in a POPC:POPE bilayer at a ratio of 1.3:1. **(A)** Shows a lateral view of the system while **(B)** shows the orientation of the protein as seen on the side view.

## References

1. Case, D.A.; Betz, R.; Cerutti, D.; Cheatham, T.; Darden, T.; Duke, R.; Giese, T.; Gohlke, H.; Goetz, A.; Homeyer, N.; et al. AMBER 2016 Reference Manual. *Univ. Calif. San Franc.* **2016**, 1–923.
2. Roe, D.R.; Cheatham, T.E. PTRAJ and CPPTRAJ: Software for Processing and Analysis of Molecular Dynamics Trajectory Data. *J Chem Theory Comput* **2013**, *9*, 3084–3095, doi:10.1021/ct400341p.
3. BIOVIA, D.S. Discovery Studio Modeling Environment, Release 2017, San Diego: DassaultSystèmes, 2016. Available From Accessed 1 Sept. 2016 **2016**.
4. Frisch, M.; Trucks, G.; Schlegel, H.; Scuseria, G.; Robb, M.; Cheeseman, J.; Scalmani, G.; Barone, V.; Petersson, G.; Nakatsuji, H.; et al. Gaussian 09, Revision A. 02, Gaussian, Inc., Wallingford, CT, 2016. *Chem. Chem. Phys. Accept. Manuscr.*
5. Nielsen, A.; Holder, A. Gauss View 3.0, User's Reference. *Gaussian Inc Pittsburgh PA* **2003**.
6. Abraham, M.; Murtola, T.; Schulz, R.; Páll, S.; Smith, J.; Hess, B.; Lindahl, E. GROMACS: High Performance Molecular Simulations through Multi-Level Parallelism from Laptops to Supercomputers. *SoftwareX* **2015**, *1*, doi:10.1016/j.softx.2015.06.001.
7. Gordon, J.C.; Myers, J.B.; Folta, T.; Shoja, V.; Heath, L.S.; Onufriev, A. H++: A Server for Estimating PKas and Adding Missing Hydrogens to Macromolecules. *Nucleic Acids Res* **2005**, *33*, W368–W371, doi:10.1093/nar/gki464.
8. Zhang, Y. I-TASSER Server for Protein 3D Structure Prediction. *BMC Bioinformatics* **2008**, *9*, 40, doi:10.1186/1471-2105-9-40.
9. Roy, A.; Kucukural, A.; Zhang, Y. I-TASSER: A Unified Platform for Automated Protein Structure and Function Prediction. *Nat. Protoc.* **2010**, *5*, 725–738, doi:10.1038/nprot.2010.5.
10. Yang, J.; Yan, R.; Roy, A.; Xu, D.; Poisson, J.; Zhang, Y. The I-TASSER Suite: Protein Structure and Function Prediction. *Nat. Methods* **2015**, *12*, 7–8, doi:10.1038/nmeth.3213.
11. Schrödinger *Schrödinger Release 2019–3, Maestro*; New York, 2019;
12. Brown, D.K.; Penkler, D.L.; Sheik Amamuddy, O.; Ross, C.; Atilgan, A.R.; Atilgan, C.; Tastan Bishop, Ö. MD-TASK: A Software Suite for Analyzing Molecular Dynamics Trajectories. *Bioinformatics* **2017**, *33*, 2768–2771, doi:10.1093/bioinformatics/btx349.
13. Li, P.; Merz, K.M. MCPB.Py: A Python Based Metal Center Parameter Builder. *J Chem Inf Model* **2016**, *56*, 599–604, doi:10.1021/acs.jcim.5b00674.
14. Schott-Verdugo, S.; Gohlke, H. PACKMOL-Memgen: A Simple-to-Use, Generalized Workflow for Membrane-Protein–Lipid-Bilayer System Building. *J. Chem. Inf. Model.* **2019**, *59*, 2522–2528, doi:10.1021/acs.jcim.9b00269.
15. Laskowski, R.; MacArthur, M.; Moss, D.; Thornton, J. PROCHECK: A Program to Check the Stereochemical Quality of Protein Structures. *J. Appl. Crystallogr.* **1993**, *26*, 283–291, doi:10.1107/s0021889892009944.
16. DeLano, W.L.; others Pymol: An Open-Source Molecular Graphics Tool. *CCP4 Newsl. Protein Crystallogr.* **2002**, *40*, 82–92.

17. Lovell, S.C.; Davis, I.W.; Arendall, W.B.; de Bakker, P.I.W.; Word, J.M.; Prisant, M.G.; Richardson, J.S.; Richardson, D.C. Structure Validation by Calpha Geometry: Phi, Psi and Cbeta Deviation. *Proteins* **2003**, *50*, 437–450, doi:10.1002/prot.10286.
18. Humphrey, W.; Dalke, A.; Schulten, K. VMD: Visual Molecular Dynamics. *J. Mol. Graph.* **1996**, *14*, 33–8, 27–8, doi:10.1016/0263-7855(96)00018-5.
